Conditional antagonism in co-cultures of *Pseudomonas aeruginosa* and *Candida albicans*: an intersection of ethanol and phosphate signaling distilled from dual-seq transcriptomics

Georgia Doing, Katja Koeppen, Patricia Occipinti, and Deborah A. Hogan\*

Geisel School of Medicine at Dartmouth, Hanover, NH 03755

Running title: Conditional antagonism between *C. albicans* and *P. aeruginosa*

\*To whom correspondence should be addressed

Department of Microbiology and Immunology,

Geisel School of Medicine at Dartmouth

Rm 208 Vail Building, Hanover, NH 03755

E-mail: [dhogan@dartmouth.edu](mailto:dhogan@dartmouth.edu)

Tel: (603) 650-1252

## 1 **Abstract**

2           *Pseudomonas aeruginosa* and *Candida albicans* are opportunistic pathogens  
3 whose interactions involve the secreted products ethanol and phenazines. Here we  
4 describe the focal role of ethanol in mixed-species co-cultures by dual RNA-seq analyses.  
5 *P. aeruginosa* and *C. albicans* transcriptomes were assessed after growth in mono-  
6 culture or co-culture with either ethanol-producing *C. albicans* or a *C. albicans* mutant  
7 lacking the primary ethanol dehydrogenase, Adh1. Analyses using KEGG-pathways and  
8 the previously published eADAGE method revealed several *P. aeruginosa* responses to  
9 *C. albicans*-produced ethanol including the induction of a non-canonical low phosphate  
10 response mediated by PhoB. *C. albicans* wild-type, but not *C. albicans adh1Δ/Δ*, induces  
11 *P. aeruginosa* production of 5-methyl-phenazine-1-carboxylic acid (5-MPCA), which  
12 forms a red derivative within fungal cells. We first demonstrate that PhoB is required for  
13 this interaction and that PhoB hyperactivity, via deletion of *pstB*, leads to increased  
14 production of 5-MPCA even when phosphate concentrations are high, but only in the  
15 presence of ethanol. Second, we show that ethanol is only sufficient to promote 5-MPCA  
16 production at permissive phosphate concentrations. The intersection of ethanol and  
17 phosphate in co-culture is mirrored in *C. albicans*; the *adh1Δ/Δ* mutant had increased  
18 expression of genes regulated by Pho4, the *C. albicans* transcription factor that responds  
19 to low phosphate which we confirmed by showing the *adh1Δ/Δ* strain had elevated Pho4-  
20 dependent phosphatase activity. The dual-dependence on ethanol and phosphate  
21 concentrations for anti-fungal production highlights how environmental factors modulate  
22 microbial interactions and dictate antagonisms such as those between *P. aeruginosa* and  
23 *C. albicans*.

24

25 Author Summary

26

27 *Pseudomonas aeruginosa* and *Candida albicans* are opportunistic pathogens that are  
28 frequently isolated from co-infections. Using a Dual-Seq approach in combination with  
29 genetics approaches, we found that ethanol produced by *C. albicans* stimulates the PhoB  
30 regulon in *P. aeruginosa* asynchronously with activation of the Pho4 regulon in *C.*  
31 *albicans*. In doing so, we demonstrate that eADAGE-based analysis can improve the  
32 understanding of the *P. aeruginosa* response to ethanol-producing *C. albicans* as  
33 measured by transcriptomics: we identify a subset of PhoB-regulated genes as  
34 differentially expressed in response to ethanol. We validate our result by showing that  
35 PhoB is necessary for multiple roles in co-culture including the competition for phosphate  
36 and the production of 5-methyl-phenazine-1-carboxylic acid, and that the *P. aeruginosa*  
37 response to *C. albicans*-produced ethanol depends on phosphate availability. The  
38 conditional stimulation of virulence production in response to sub-inhibitory  
39 concentrations of ethanol only under phosphate limitation highlights the importance of  
40 considering nutrient concentrations in the analysis of co-culture interactions.

## 41 Introduction

42 *Pseudomonas aeruginosa* and *Candida albicans* are opportunistic pathogens that  
43 are frequently isolated from co-infections [1-11]. These pathogens affect each other's  
44 behaviors through competition for nutrients [12-17], physical contact [3, 4, 7, 13, 14],  
45 diffusible signaling molecules [18-23] and antimicrobials [18, 21, 24-30]. Studies  
46 highlighting the dynamic interactions between *P. aeruginosa* and *C. albicans* have  
47 contributed to the growing understanding of how microbial interactions influence microbial  
48 physiology and behavior as well as microbiological and pathological outcomes.

49 Like many fermentative organisms, *C. albicans* produces ethanol. Ethanol is a  
50 biologically-active metabolite which, sub-inhibitory concentrations, modulates *P.*  
51 *aeruginosa* behavior in multiple ways: it induces activity of the sigma factor AlgU through  
52 ppGpp and DksA [31]; it promotes Pel matrix production through the Wsp system [29]; it  
53 decreases flagellar-mediated motility through a pathway implicated in cell-surface  
54 sensing [29, 32]; it affects pathways known to contribute to *P. aeruginosa* virulence [29,  
55 33]; and it fuels fungal antagonism [29]. The broad effects of ethanol apply to many  
56 contexts and the response of *P. aeruginosa* to *C. albicans*-produced ethanol can serve  
57 as a model for how *P. aeruginosa* may respond to other fermentative fungi and bacteria.  
58 We seek to further understand this response and identify common themes which may be  
59 implicated in other microbial interactions.

60 To study the effects of ethanol in co-culture, we used *P. aeruginosa* anti-fungal  
61 production as a readout of the ethanol response. Previous work has shown that ethanol  
62 promotes the production and secretion of the phenazine 5-methyl-phenazine-carboxylic  
63 acid (5-MPCA) by *P. aeruginosa* and that, in turn, *P. aeruginosa* phenazines cause an

64 increase in *C. albicans* fermentative metabolism and ethanol production [24-26]. *P.*  
65 *aeruginosa* does not normally secrete 5-MPCA in axenic cultures but in co-culture it  
66 secretes 5-MPCA through the MexGHI-OmpD efflux complex. Consequently, 5-MPCA  
67 enters *C. albicans* cells wherein it reacts with the amine group of arginine, disrupting  
68 protein function and forming a red pigment whose accumulation causes redox stress and  
69 eventually death of *C. albicans* [24, 27, 34]. While it is known that ethanol production by  
70 the fungus is necessary for *P. aeruginosa* 5-MPCA release, the mechanisms by which 5-  
71 MPCA production is regulated have not yet been described. The mechanisms of  
72 stimulation and ensuing consequences of *P. aeruginosa* 5-MPCA production and  
73 accumulation of the red 5-MPCA-derivative within *C. albicans* cells is a scopic case study  
74 for microbial interactions because it is an indicator of general antagonism.

75         Several studies have described the conditional production of antagonistic factors  
76 in response to nutrient availability such as phosphate or iron limitation [35-52]. This is  
77 often mediated transcriptionally, and such is the case for the low phosphate response  
78 which is mediated by the PhoR-PhoB two-component system wherein inorganic  
79 phosphate is sensed through the periplasmic domain of the phosphate transport complex,  
80 PstS, which is dependent on the ATPases PstA and PstB. The failure to bind phosphate  
81 in low phosphate environments causes the de-repression of the sensor kinase PhoR  
82 which phosphorylates the response regulator PhoB and initiates PhoB DNA-binding to  
83 the promoters of many genes.

84         This environmentally responsive regulation aids in the competition for essential  
85 nutrients. For example, the *P. aeruginosa* low-phosphate response includes the secretion  
86 of an arsenal of phosphatases, phospholipases and DNases that cleave phosphate from

87 diverse macromolecules [40]. However, the secretion of these enzymes renders  
88 phosphate freely available to any nearby organism. Simultaneous production of  
89 antagonistic factors could aid *P. aeruginosa* in the competition for phosphate amongst  
90 other microbes. Indeed, in response to low phosphate and other complex stimuli, *P.*  
91 *aeruginosa* produces antagonistic factors like phenazines and phospholipases which play  
92 important roles in microbial interactions [39, 53, 54]. It has been reported that *P.*  
93 *aeruginosa* tailors its low phosphate response to secondary stimuli: in *P. aeruginosa*  
94 PhoB interacts with other regulators such as the transcription factor TctD [55] and the  
95 sigma factor Vrel [37] to orchestrate the expression of its target genes. However, the  
96 mechanism by which PhoB exerts condition-specific control over its diverse regulon to  
97 manage antagonistic factors in microbial interactions, is not yet fully understood.

98 Co-culture transcriptomics data from single species RNA-Seq or dual RNA-Seq  
99 methods can be heterogeneous due to varying temporal and spatial relationships  
100 between organisms. Variability can make such data difficult to analyze with traditional  
101 statistical and pathway-based approaches. However, these data contain a wealth of  
102 information about nutrient competition, synergy and antagonism in microbial interactions.  
103 Therefore, it may be necessary to use techniques, such as recent machine learning based  
104 methods, that allow for the detection of subtle and novel transcriptional signals in order  
105 to render this important and complex data informative [53, 56-59].

106 Analysis of transcriptomic data from complex environments using curated  
107 pathways can be challenging if the conditions are not well represented by the data used  
108 for pathway definition. Furthermore, pathway definition relies on expert-contributed  
109 annotations, yet ~38% (2,162 of 5,704) of genes for PAO1 reference strain

110 (pseudomonas.com) lack description. Recent methods are using unsupervised machine  
111 learning to leverage large amounts of transcriptomic data and automatically identify sets  
112 of genes with correlated expression across large compendia of samples, agnostic of gene  
113 annotations and previously characterized pathways [56, 57, 59-62]. With over 2,000  
114 transcriptional profiles of *P. aeruginosa* in the public sphere, such an approach has been  
115 successfully implemented to make expression-based gene sets which can be used as  
116 data-driven analytical tools that can bolster transcriptional analyses [53, 58, 63, 64]. In  
117 particular, the data-driven tool eADAGE has identified transcriptional signals that contain  
118 uncharacterized genes, manifest as small magnitude changes in expression, or are  
119 condition-specific yet biologically informative.

120 Here we demonstrate that *P. aeruginosa* and *C. albicans* undergo transcriptional  
121 changes in response to one another dependent on *C. albicans* ethanol production. Using  
122 eADAGE analysis we identify a group of PhoB-regulated genes as differentially  
123 expressed in response to ethanol and validate the result using genetic and biochemical  
124 assays that show PhoB is necessary for accumulation of the red 5-MPCA-derivative in *C.*  
125 *albicans* cells and that ethanol is sufficient to stimulate PhoB in mono-culture. We show  
126 that in co-culture PhoB regulation of phosphate scavenging and 5-MPCA production are  
127 independently necessary for *P. aeruginosa* fitness and antagonism against *C. albicans*  
128 respectively. Further, by examining *C. albicans* gene expression profiles matched to  
129 those of *P. aeruginosa* from the same co-cultures, we show that the *C. albicans* low  
130 phosphate response is inversely correlated to that of *P. aeruginosa* linking the  
131 coincidence of these stimuli in co-culture. By requiring dual-stimulation, In summary, we  
132 show that *P. aeruginosa* only produces antifungal 5-MPCA when the death of neighboring

133 fungi would simultaneously remove a competitor and provide a source of the essential  
134 nutrient phosphate: in both the presence of fermenting *C. albicans* and phosphate  
135 limitation. We conclude that the enmity of *P. aeruginosa* – *C. albicans* interactions is  
136 conditional upon ethanol and phosphate concentrations.

137

## 138 **Results**

### 139 **Ethanol is a defining factor in *P. aeruginosa* – *C. albicans* interactions stimulating** 140 **antagonism wrought by transcriptional changes in both organisms**

141 When grown on a lawn of *C. albicans*, *P. aeruginosa* produces the anti-fungal  
142 phenazine 5-MPCA which is taken up by *C. albicans* and modified within the fungal cells  
143 to form a red derivative [24, 27, 29] that can be seen first below and then as a halo  
144 surrounding *P. aeruginosa* colonies (**Fig. 1A**). The 5-MPCA precursor phenazine-1-  
145 carboxylic acid (PCA) can be synthesized via enzymes encoded in either of the two highly  
146 similar operons, *phzA1B1C1D1E1F1G1* (*phz1*) and *phzA2B2C2D2E2F2G2* (*phz2*) with  
147 different regulation; *phz1* contributes to phenazine production in liquid while *phz2* is  
148 responsible for phenazine production in colony biofilms [65]. Analysis of phenazine  
149 production in co-culture found that *phz1* was dispensable for the formation of red pigment,  
150 while *phz2* was required (**Fig. 1A**). Consistent with previous results, 5-MPCA-derived red  
151 pigment formation required *phzM* [27], *mexGHI-ompD* and *soxR* [24], and was over-  
152 abundant in upon deletion of *phzS*, which catalyzes the conversion of 5-MPCA into  
153 another phenazine, pyocyanin [66] (**Fig. S1 A**). As we have previously reported and  
154 reproduced here, *P. aeruginosa* 5-MPCA production required *C. albicans* ethanol  
155 production as the *C. albicans adh1Δ/Δ*, which lacks the major ethanol dehydrogenase,



156 did not elicit 5-MPCA-derived red pigment accumulation [29]. Chromosomal  
157 complementation of a single copy of *ADH1* in *C. albicans* restored *P. aeruginosa* 5-MPCA  
158 production (**Fig. 1A**).

159 To determine how *C. albicans* ethanol production influenced *P. aeruginosa* and  
160 how 5-MPCA-derived red pigment accumulation influenced *C. albicans*, we took a dual  
161 RNA-Seq approach in which we collected total RNA for simultaneous transcriptome-wide  
162 analyses of both organisms from 16 h co-cultures of *P. aeruginosa* with *C. albicans* WT,  
163 in which 5-MPCA-derivatives accumulated, and co-cultures of *P. aeruginosa* with *C.*  
164 *albicans adh1Δ/Δ*, in which 5-MPCA products were not observed (see **Fig. 1B** for  
165 experimental set up). Single-species *P. aeruginosa* and *C. albicans* colony biofilms grown  
166 on YPD medium were also analyzed at the same time point. Principle component analysis  
167 (PCA) of gene expression for each organism differentiated mono-culture and co-culture  
168 with the first component PC1, which accounted for 40.1% and 44.7% of total variance for  
169 *P. aeruginosa* and *C. albicans* respectively (**Fig. 1C,D**). The presence of *ADH1* in *C.*  
170 *albicans* constituted a defining feature of co-culture in PC2 for both organisms, which  
171 captured 18.8% and 28.2% of total variance for *P. aeruginosa* and *C. albicans*  
172 respectively (**Fig. 1C,D**). Comparison of *P. aeruginosa* gene expression on either *C.*  
173 *albicans* WT or *adh1Δ/Δ* to gene expression in mono-culture found 1,830 differentially  
174 expressed genes (DEGs) with an absolute log<sub>2</sub>fold-change (logFC) > 1 and a corrected  
175 p-value (FDR) < 0.05. Over half of the DEGs between *P. aeruginosa* in mono-culture and  
176 on *C. albicans* WT were also DEGs between *P. aeruginosa* grown on *C. albicans* WT  
177 compared to *adh1Δ/Δ* suggesting that a major portion of *P. aeruginosa* gene expression  
178 in co-culture was influenced by *C. albicans* ethanol production (**Fig. 1E** and **Supp.**

179 **Dataset 1)**. A similar trend was evident in *C. albicans* gene expression as approximately  
180 half of the DEGs between mono- and co-culture with *P. aeruginosa* were also DEGs  
181 between *C. albicans* WT and *C. albicans adh1Δ/Δ* from co-cultures (**Fig. 1F** and **Supp.**  
182 **Dataset 2)**. Here, expression patterns of DEGs in both *P. aeruginosa* and *C. albicans*  
183 illustrated that ethanol played a defining role in *P. aeruginosa* – *C. albicans* interactions  
184 from the perspectives of both organisms.

185

### 186 **How fungal ethanol shapes co-culture transcriptomes: the *C. albicans* perspective**

187 *C. albicans* Adh1 is responsible for reducing acetaldehyde to ethanol during  
188 fermentation, and we thus expected metabolic shifts between *C. albicans* WT and  
189 *adh1Δ/Δ* [29]. We identified DEGs between co-cultures of *C. albicans* WT and *adh1Δ/Δ*  
190 with *P. aeruginosa* and conducted KEGG [67-69] pathway over-representation analysis.  
191 The *C. albicans* KEGG pathway for fatty acid beta oxidation was over-represented in the  
192 DEGs and the genes it contained (e.g. *FAA2-1*, *FAA2-3*) were more highly expressed in  
193 *C. albicans* WT than in *C. albicans adh1Δ/Δ* (**Fig. 2**, **Supp. Dataset 3**). Since these  
194 pathways were not over-represented in DEGs between *C. albicans* WT and *C. albicans*  
195 *adh1Δ/Δ* in mono-culture, where there is no *P. aeruginosa*-produced 5-MPCA, these  
196 results are consistent with a previous report of a phenazine and other mitochondrial  
197 inhibitors increasing beta-oxidation in *C. albicans* WT as determined in metabolomics  
198 studies [70].

199 Other KEGG pathways over-represented in DEGs in *C. albicans* from co-cultures  
200 of *C. albicans* WT with *P. aeruginosa* compared to *C. albicans adh1Δ/Δ* with *P. aeruginosa*  
201 were amino acid metabolism (e.g. *PUT2*, *GLT1*), sulfur metabolism (e.g. *MET15*) and

202 peroxisomal transport (e.g. *PEX1*, *PEX19*) (**Fig. 2, Supp. Dataset 3**). These pathways  
203 converge on reactive oxygen species (ROS) mitigation (e.g. *GSH1*, *CAT1*) and, since  
204 previous reports have shown phenazines causing redox stress to neighboring fungi [25,  
205 26], the upregulation of these pathways could have been due to ethanol-induced *P.*  
206 *aeruginosa* 5-MPCA production.

207 The KEGG pathway for glycolysis (e.g. *HXK2*, *PGI1*) was also over-represented  
208 in DEGs between *C. albicans* WT in co-culture with *P. aeruginosa* and *C. albicans*  
209 *adh1Δ/Δ* in co-culture with *P. aeruginosa*, but the genes within were more highly  
210 expressed in *C. albicans adh1Δ/Δ* compared to *C. albicans* WT, perhaps as metabolic  
211 compensation for the inability to ferment to ethanol (**Fig. 2, Supp. Dataset 3**). Similarly,  
212 there was also over-representation of the KEGG pathway for iron scavenging (e.g. *FRP1*,  
213 *FET99*) and these genes were again more highly expressed in *C. albicans adh1Δ/Δ* (**Fig.**  
214 **2, Supp. Dataset 3**). Since the KEGG pathway for iron scavenging was not over-  
215 represented in DEGs between *C. albicans* WT and *C. albicans adh1Δ/Δ* in mono-culture  
216 (**Supp. Dataset 3**), the increase in iron scavenging may have been due to a change in *P.*  
217 *aeruginosa* behavior that affected iron availability.

218 In co-cultures of *P. aeruginosa* with ethanol-deficient *C. albicans adh1Δ/Δ*, which  
219 did not promote 5-MPCA production, *C. albicans* also had higher expression of genes  
220 involved in DNA damage repair (e.g. *RBT5*, *CSA1*) (**Fig. 2**). While not a result of *P.*  
221 *aeruginosa* 5-MPCA, such damage may have been caused by another *P. aeruginosa*  
222 antagonistic factor. However, the KEGG pathways for DNA replication and repair were  
223 also over-represented in the DEGs between *C. albicans* and *adh1Δ/Δ* in mono-culture  
224 (**Supp. Dataset 3**), so DNA damage may be a native consequence of the loss of Adh1 in

225 *C. albicans*, which is consistent with previous reports of an *adh1* $\Delta/\Delta$  mutant having higher  
226 intracellular concentrations of the DNA-damaging metabolic intermediate methylglyoxal  
227 [71, 72].

228

## 229 **How fungal ethanol shapes co-culture transcriptomes: the *P. aeruginosa*** 230 **perspective**

231 We identified *P. aeruginosa* DEGs when grown on *C. albicans* WT compared to  
232 on *adh1* $\Delta/\Delta$ . On *C. albicans* WT, *P. aeruginosa* upregulated genes involved in 5-MPCA  
233 biosynthesis including *phzM* and genes within both the *phz1* and *phz2* operons, which is  
234 consistent with differences in 5-MPCA formation between the two co-cultures (**Fig. 2**).  
235 While the last four genes of the *phz* operons have fewer than three SNPs between each  
236 gene pair and are thus not differentiated by alignment *phzA1*, *phzB1* and *phzC1* have  
237 substantial enough differences in sequence from *phzA2*, *phzB2* and *phzC2* respectively  
238 that the two operons can be distinguished, and we found that transcripts from both  
239 operons were more highly abundant by at least 2-fold when *P. aeruginosa* was grown in  
240 co-culture with *C. albicans* WT relative to with *adh1* $\Delta/\Delta$ . While *phzS* and *phzH* are not  
241 required for 5-MPCA biosynthesis [24, 29] they have been reported to have coordinated  
242 expression with other phenazine genes [55, 73] and indeed we saw increases in their  
243 expression on *C. albicans* WT compared to *C. albicans adh1* $\Delta/\Delta$  as well (**Fig. 2**).

244 We again conducted KEGG pathway over-representation analysis and found over-  
245 representation of three KEGG pathways in DEGs from *P. aeruginosa* grown in co-culture  
246 with *C. albicans* WT compared to with *C. albicans adh1* $\Delta/\Delta$ : phenazine biosynthesis,  
247 quorum sensing (QS) and pyochelin biosynthesis (**Fig. 2, Supp. Dataset 3**). Over-

248 representation of the phenazine biosynthesis pathway was expected based on the  
249 upregulation of the *phz* genes as described above. The identification of QS as an over-  
250 represented pathway was also not surprising in light of the known regulation of phenazine  
251 biosynthesis by QS in response to environmental cues [74, 75], including in *C. albicans*  
252 co-culture [27]. *P. aeruginosa* QS involves three major transcriptional regulators: LasR  
253 [76], PqsR [77] and RhIR [76]. RhIR and PqsR were necessary for phenazine production  
254 (**Fig. S1B**). Although  $\Delta lasR$  appeared to produce less 5-MPCA than *P. aeruginosa* WT  
255 on *C. albicans* WT, consistent with previous data, it produced an abundance of the blue-  
256 green phenazine pyocyanin, which is a 5-MPCA-derivative [18]. Upon examining the  
257 expression of gene targets for these transcription factors (**Supp. Dataset 6**), we found  
258 heterogenous expression patterns inconsistent with canonical, cell-density regulated QS  
259 but reconcilable with activation of a subset of QS regulated genes that includes phenazine  
260 biosynthesis genes (**Fig. S1C,D**).

261 The third over-represented KEGG pathway was that for the biosynthesis of  
262 pyochelin, a siderophore [51]. Expressly, genes involved in pyochelin biosynthesis, import  
263 and regulation were lower in *P. aeruginosa* on *C. albicans* WT compared to on *C. albicans*  
264 *adh1* $\Delta/\Delta$ . Pyochelin and another siderophore, pyoverdine, are fluorescent, and we  
265 supported the RNA-Seq data by showing increased *P. aeruginosa*-derived fluorescence  
266 on *C. albicans adh1* $\Delta/\Delta$  compared to on *C. albicans* WT (**Fig. 2**, inset). The over-  
267 representation of low iron responsive genes in both *P. aeruginosa* and *C. albicans*  
268 demonstrated that the organisms were experiencing simultaneous iron limitation. Taken  
269 together these data are consistent with 1) *C. albicans* ethanol production stimulated *P.*  
270 *aeruginosa* antagonistic 5-MPCA production which affected *C. albicans* metabolism and

271 ROS stress pathways and 2) increased glycolysis in *C. albicans adh1Δ/Δ* that  
272 compensated for the inability to ferment coincided with a competition for iron.

273

274 **eADAGE analysis of *P. aeruginosa* transcriptome revealed additional pathways**  
275 **differentially active in response to ethanol in co-culture with *C. albicans***

276 While the analysis of DEGs and the KEGG pathways over-represented therein  
277 provided insight into two key *P. aeruginosa* – *C. albicans* interactions, only 19 of the 120  
278 *P. aeruginosa* DEGs ( $|\log_{2}FC| > 2$ ,  $FDR < 0.05$ ) fell within the three statistically over-  
279 represented KEGG pathways: QS (orange bar), phenazine biosynthesis (red bar) and  
280 pyochelin biosynthesis (blue bar) (**Fig. 3A**). To look for additional processes that were  
281 affected by *C. albicans* ethanol production, we further identified patterns in the RNA-Seq  
282 data using eADAGE, a denoising autoencoder-based tool [53, 58, 64]. In eADAGE  
283 analysis, the activities of previously-defined gene expression signatures are calculated  
284 as a weighted sum of normalized gene expression values (TPM) where gene weights are  
285 unique to each signature [64]. The eADAGE signatures were derived irrespective of  
286 human curation, which allowed for the examination of gene sets with coherent expression  
287 patterns but no annotation to date. The eADAGE-transformed *P. aeruginosa* – *C. albicans*  
288 co-culture signature activity profiles had a higher clustering coefficient (CC) by condition  
289 than was observed by normalized gene expression profiles; the CC for differentially active  
290 eADAGE signatures (DASs) was 0.68 compared to 0.38 for gene expression data;  
291 randomized data had CC values less than 0.14 (**Table S1**). The higher CC after eADAGE  
292 signature transformation indicated that biological information was retained and signals  
293 that differentiated sample types may be more clear at the pathway level. Using eADAGE,

294 we found 48 DASs in *P. aeruginosa* grown on *C. albicans* WT versus *P. aeruginosa* grown  
295 on *C. albicans adh1Δ/Δ* (**Supp. Dataset 3**).

296 As predicted by the DEG analysis (**Fig. 3A**), there were multiple DASs in which  
297 phenazine biosynthesis and pyochelin biosynthesis KEGG pathways were over-  
298 represented (**Fig. 3B**, red and blue bars respectively). The detection of multiple  
299 signatures enriched in these pathways was expected based on the presence of similar  
300 signatures that are redundant in some contexts but discriminating in others [53]. There  
301 were 32 DASs (**Fig. 3B**, black bar) with over-representations of 7 additional pathways (all  
302 pathways over-represented in DASs shown in inset) and 16 DASs in which no pathway  
303 was over-represented (**Fig. 3B**, grey bar), perhaps representing novel transcriptional  
304 signals. As expected based on the larger differences in gene expression for phenazine  
305 biosynthetic genes, multiple signatures that contained over-representations of phenazine  
306 biosynthesis (annotated as phenazine or pyocyanin) (red) had increased activity in *P.*  
307 *aeruginosa* grown on *C. albicans* WT compared to *P. aeruginosa* grown on *C. albicans*  
308 *adh1Δ/Δ*, and together contained over-representations of pyochelin biosynthesis  
309 (annotated as siderophore or iron transport) (blue) had decreased activity in *P.*  
310 *aeruginosa* grown on *C. albicans* WT compared to *P. aeruginosa* grown on *C. albicans*  
311 *adh1Δ/Δ*. Other pathways over-represented in DASs included amino acid metabolism,  
312 styrene metabolism and zinc uptake (**Fig. 3B** inset, **Supp. Dataset S4**). Notably, one  
313 differentially active signature, Node206neg (N206n), contained ethanol catabolism genes  
314 (**Fig. 3C**, pink dot). The signature with the largest increase in activity, Node108neg  
315 (N108n) (**Fig. 3C**, violet dot) was not enriched in any KEGG pathways. However, we had  
316 previously identified Node108neg as significantly more active in low phosphate media

317 than phosphate replete media across the compendium of gene expression on which  
318 eADAGE was trained [53]. Therefore, upon identifying Node108neg as the most activated  
319 eADAGE signature in response to *C. albicans* ethanol production in co-culture, we further  
320 investigated the genes within Node108neg and their connection to the *P. aeruginosa* low  
321 phosphate response.

322

### 323 **eADAGE analysis suggests *P. aeruginosa* PhoB up-regulated genes in response to** 324 ***C. albicans* ethanol production**

325 In the most upregulated eADAGE signature, Node108neg, the set of PhoB-  
326 regulated genes PhoB (i.e. the PhoB regulon) was significantly over-represented  
327 (hypergeometric test:  $p = 5.9 \times 10^{-9}$ ). The PhoB regulon has been extensively defined  
328 through rigorous experimental methods including mutant transcriptomics, motif analysis  
329 and chromatin immunoprecipitation assays [55]. Of the 32 genes in Node108neg, 11 were  
330 also in the PhoB regulon (**Fig 3D**) and they all increased in expression in *P. aeruginosa*  
331 grown on *C. albicans* WT compared to *adh1* $\Delta/\Delta$ , but the Pho regulon defined in Bielecki  
332 *et al.* was heterogeneously expressed overall (**Fig. 3E**). We examined DEGs in the  
333 context of signatures more closely in order understand how changes in eADAGE  
334 signature activities embodied the *P. aeruginosa* response to *C. albicans*-produced  
335 ethanol and whether *P. aeruginosa* gene expression changes between growth on *C.*  
336 *albicans* WT and *adh1* $\Delta/\Delta$  signaled a low phosphate response.

337 We visualized relationships among DEGs in the eADAGE gene-gene network. The  
338 full gene-gene network consists of the 5,549 *P. aeruginosa* genes used to create the  
339 eADAGE model as vertices with similarities in transcriptional patterns as weighted edges



340 (shorter edges represent higher Pearson correlations between gene weights across all  
341 signatures in the eADAGE model) [53, 58, 64]. Here we show strongly DEGs (logFC > 2,  
342 p-value < 0.01) between *P. aeruginosa* grown on *C. albicans* WT and *adh1Δ/Δ* connected  
343 by edges whose weight is drawn from the full gene-gene network (edge cutoff  $\pm 0.5$ ) (**Fig.**  
344 **3F**). DEGs fell into cliques (**Table S2**) when visualized as a sub-network within the  
345 eADAGE gene-gene network (**Fig. 3D**). The three largest cliques contained genes  
346 relevant to the biological processes of phenazine biosynthesis (clique 1, 17 genes),  
347 pyochelin biosynthesis (clique 2, 29 genes), and the low phosphate response (clique 3,  
348 23 genes) (**Fig. 3F**). Other cliques contained genes involved in isoprenoid catabolism  
349 (clique 4), magnesium flux across the membrane (clique 5), aconitate porins (clique 6),  
350 pyrimidine metabolism (clique 7), pyocin biosynthesis (clique 8), spermidine biosynthesis  
351 (clique 9), histidine metabolism (clique 10), the heat shock response (clique 11), and the  
352 ROS stress response (clique 12). Most notably, many genes within clique 3, which were  
353 related to the low phosphate response, were also in Node108neg.

354 Genes within clique 3 clustered into two groups by gene expression: four were  
355 more highly expressed in the *P. aeruginosa* grown on *C. albicans adh1Δ/Δ* and 19 genes  
356 were more highly expressed in *P. aeruginosa* grown on *C. albicans* WT, including those  
357 in Node108neg (**Fig. 3G**). Notably, both groups of genes are regulated by PhoB, but are  
358 in different operons. The group of *P. aeruginosa* genes that were more highly expressed  
359 when grown on *C. albicans adh1Δ/Δ* fall within the neighboring operons *phoBR* and  
360 *pstABC*. The group of *P. aeruginosa* genes that were more highly expressed when grown  
361 on *C. albicans* WT belong to the consecutive operons that encode the Hxz type II  
362 secretion system (PA14\_55450, PA14\_55460) and its substrate enzyme the

363 phosphatase *lapC* [78]. The latter group of genes also contained genes involved in TonB-  
364 dependent transport (*exbB2*, *exbD2*) as well as the phosphatases *phoA*, and the  
365 phospholipases *plcN*. All of these genes are canonically co-regulated by PhoB and  
366 usually have positively correlated expression patterns but it appeared as if PhoB was  
367 selectively promoting the expression of only a subset of its regulon. We demonstrated  
368 that the non-canonical PhoB response identified by eADAGE was biologically meaningful  
369 through genetic, biochemical and phenotypic experiments described below.

370

371 **The *P. aeruginosa* low phosphate response was activated in response to *C.***  
372 ***albicans* ethanol production**

373 eADAGE analysis of the co-culture RNA-Seq data found higher levels of some  
374 PhoB-regulated transcripts in *P. aeruginosa* co-cultured with *C. albicans* WT than in *P.*  
375 *aeruginosa* co-cultured with *C. albicans adh1Δ/Δ*. We confirmed this result using  
376 NanoString, a multiplex RNA analysis method, to measure the mRNA levels of  
377 representative PhoB-regulated genes. The data shown are normalized to six house  
378 keeping genes as described in the Methods section. Like in the RNA-Seq data, there was  
379 a split in the expression of PhoB-regulated genes: phosphate transport-associated genes  
380 *phoR*, *phoB*, *pstA* and *phoU* did not increase in expression (**Fig. 4A**, bottom section) but  
381 those encoding phosphate scavenging enzymes did: glycosyl transferase PA14\_53380,  
382 glycerophosphoryl diester phosphodiesterase *glpQ*, TonB-dependent transport protein  
383 *exbD2*, phosphonate transporter *phnD* and alkaline phosphatase *phoA*. As well as genes  
384 for phenazine biosynthesis (**Fig. 4A**, top two sections). Additionally, ethanol catabolism

385 genes *exaA* and *exaB* showed PhoB-independent increases in expression (**Fig. 4A**, third  
386 section).

387 We assessed PhoB activity in co-culture using phosphate supplementation, the  
388 native suppressor of PhoB. The addition of 10 mM potassium phosphate to the medium  
389 underlying the co-cultures resulted in a decrease in the expression levels of PhoB  
390 regulated genes (**Fig. 4A**, top section), including phenazine genes (**Fig. 4A**, second  
391 section). Visualization of transcript levels by sample revealed some heterogeneity which  
392 we predicted was indicative of a dynamic response as both species grow. To additionally  
393 confirm the expression of these genes was PhoB-dependent we included  $\Delta phoB$  in co-  
394 culture with *C. albicans* WT. The histogram to the right shows the mean signal of PhoB-  
395 dependence (*P. aeruginosa* WT on *C. albicans* WT / *P. aeruginosa*  $\Delta phoB$  on *C. albicans*  
396 WT) and indicates that expression of expected PhoB targets but not ethanol catabolism  
397 genes was PhoB-dependent.

398 Complementing transcript abundance data, promoter activity in *P. aeruginosa* WT  
399 decreased in response to 10 mM phosphate in co-culture with *C. albicans* WT as  
400 measured by promoter fusion assay of the PhoB target *pdhA* [41], **Fig. 4B**). These data  
401 suggested that in co-culture, the bioavailability of phosphate modulated PhoB activity  
402 which may have affected co-culture interactions.

403

#### 404 **PhoB was necessary for 5-MPCA-derived red pigment accumulation in *P.*** 405 ***aeruginosa* – *C. albicans* co-culture**

406 Given the dependence on PhoB for the expression of phenazine biosynthesis  
407 genes, we determined if PhoB was necessary for the accumulation of 5-MPCA-derived

408 red pigment in co-culture with *C. albicans* WT. *P. aeruginosa*  $\Delta phoB$  did not support  
409 accumulation of the 5-MPCA-derivative as indicated by the lack of red pigment in co-  
410 culture with ethanol-producing *C. albicans* WT, and this was restored by chromosomal  
411 complementation with a wild-type copy of *phoB* in *P. aeruginosa*, provided *C. albicans*  
412 had a functional *ADH1* gene (**Fig. 4C**). Phenazine production was also dependent on  
413 PhoR, the known regulatory kinase of PhoB, and the  $\Delta phoR$  phenotype was  
414 complemented by a wild-type copy of *phoR* expressed on an extrachromosomal plasmid.

415 We further demonstrated that PhoB activity is required for 5-MPCA production as  
416 phosphate supplementation led to a decrease in 5-MPCA-derived red pigment in *P.*  
417 *aeruginosa* WT co-culture with *C. albicans* WT as seen across a gradient plate (**Fig. 4D**,  
418 top). PhoB activity was sufficient to overcome suppression by phosphate supplementation  
419 as a mutant lacking the phosphate transport ATPase *pstB* with constitutively active PhoB,  
420 continued to produce 5-MPCA-derived red pigment despite the addition of phosphate  
421 (**Fig. 4E**, second down). As expected, *P. aeruginosa* WT did not form any 5-MPCA-  
422 derived pigment in co-culture with *C. albicans* *adh1* $\Delta/\Delta$  at any phosphate concentration  
423 tested (**Fig. 4E**, third down). *P. aeruginosa*  $\Delta pstB$  grown on *adh1* $\Delta/\Delta$  only slightly rescued  
424 5-MPCA-derived red pigment formation (**Fig. 4. D**, bottom). This suggested that, while  
425 phosphate levels contributed to the control of PhoB activity, *C. albicans* Adh1 activity  
426 provided an additional stimulus that created conditions conducive to PhoB-regulated *P.*  
427 *aeruginosa* antifungal phenazine production.

428

429

430

### 431 **Ethanol was sufficient to activate PhoB at intermediate phosphate concentrations**

432 To determine if ethanol was sufficient to stimulate PhoB in *P. aeruginosa*, we  
433 monitored PhoB-regulated alkaline phosphatase (AP) activity. AP activity can be  
434 monitored by the conversion of 5-bromo-4-chloro-3-indolylphosphate (BCIP) into a  
435 colorimetric substrate according to published methods [79-81]. On MOPS (3-  
436 morpholinopropane-1-sulfonic acid) buffered minimal medium after growth for 16 h at  
437 37°C, in *P. aeruginosa*  $\Delta phz$  where all blue coloration can be attributable to BCIP  
438 conversion and not phenazines, AP was detected up to approximately 0.55 mM  
439 phosphate in the absence of ethanol (**Fig. 5A**). With the addition of 1% ethanol to the  
440 medium, *P. aeruginosa* showed AP activity at higher phosphate concentrations, up to  
441 approximately 0.73 mM phosphate (**Fig. 5A**). This induction was also seen in *P.*  
442 *aeruginosa* WT but not  $\Delta phoB$  at 0.7 mM phosphate on single concentrations plates, and  
443 was restored upon complementation with a WT copy of *phoB* (**Fig. 5B**). Quantification of  
444 AP activity under these conditions showed a 4-fold increase in the presence of 1% ethanol  
445 for WT *P. aeruginosa*, only trace AP activity for *P. aeruginosa*  $\Delta phoB$  and hyper activity  
446 in  $\Delta pstB$  (**Fig. 5C**).

447 To determine if PhoB was acting upon the same targets under ethanol  
448 supplementation in mono-culture as shown for co-culture, we monitored the expression  
449 of PhoB targets using the same Nanostring codeset described earlier. *P. aeruginosa* WT  
450 and  $\Delta phoB$  were grown in mono-culture on MOPS minimal medium with 0.7 mM  
451 phosphate with and without 1% ethanol. The same subset of PhoB-regulated genes  
452 indicated in co-culture expression analysis increased in *P. aeruginosa* WT upon ethanol  
453 supplementation: *phoA*, an alkaline phosphatase; *phnD*, a phosphonate transporter;

454 *glpQ*, a glycerophosphoryl diester phosphodiesterase (**Fig. 5D**, top section). In mono-  
455 culture, when ethanol was supplemented into the medium, we saw an increase in  
456 phenazine biosynthesis genes however, unlike in co-culture, the magnitudes of their  
457 logFC between *P. aeruginosa* WT and  $\Delta phoB$  was not as high as those of other PhoB-  
458 regulated genes suggesting their expression was also stimulated by PhoB-independent  
459 factors (**Fig. 5D**, second panel). Interestingly, the set of PhoB-regulated genes whose  
460 expression was heterogenous and did not trend upward in co-culture had expression that  
461 trended downward in mono-culture upon ethanol supplementation (**Fig. 5D**, bottom  
462 panel). Stimulation of PhoB by ethanol in mono-culture meant that ethanol could have  
463 been one of the stimuli that activated PhoB in co-culture.

464

#### 465 **Low phosphate and ethanol were additive stimulants for PhoB-mediated red** 466 **pigment formation**

467 We tested whether ethanol stimulation and canonical PhoB de-repression ( $\Delta pstB$ )  
468 had additive effects on 5-MPCA-derived red pigment formation in *P. aeruginosa* – *C.*  
469 *albicans* co-culture. On non-ethanol producing *C. albicans adh1* $\Delta/\Delta$ , the constitutive PhoB  
470 activity in *P. aeruginosa*  $\Delta pstB$  was not sufficient to stimulate red pigment as that on  
471 ethanol-producing *C. albicans* WT (**Fig. 5E**). Strikingly, the addition of 1% ethanol to *C.*  
472 *albicans adh1* $\Delta/\Delta$  lawns increased red pigment formation in *P. aeruginosa*  $\Delta pstB$  but not  
473 in *P. aeruginosa* WT or  $\Delta phoB$  (**Fig. 5E**). This signified that PhoB activation both through  
474 the canonical signaling pathway and by means of ethanol stimulation were necessary and  
475 only combined were sufficient for 5-MPCA-derived red pigment formation in co-culture  
476 (proposed model in **Fig. 5F**).

477 In light of the recent characterization of the *P. aeruginosa* response to exogenous  
478 ethanol [31] that showed ppGpp, synthesized by RelA and SpoT, DksA, and AlgU  
479 mounted a transcriptional response to ethanol, we assessed their role in ethanol-induced  
480 PhoB activation in co-culture by monitoring red pigment accumulation and in mono-  
481 culture via BCIP assay. We determined that these genes were not necessary to induce  
482 PhoB activity in response to ethanol (**Table 1**). We also ruled out roles for known  
483 mechanisms of alternative PhoB activation including contributions of the non-canonical  
484 histidine kinase KinB in both co- and mono- culture [53] and the extra-cytoplasmic  
485 function (ECF) sigma factor Vrel in monoculture, but further investigation is required to  
486 determine if Vrel played a role in regulating 5-MPCA production in co-culture [37, 41]  
487 (**Table 1**).

488 We tested the role of ethanol catabolism in PhoB activation in both mono- and co-  
489 culture. Mutants in the ExaA- dependent pathway for ethanol catabolism through acetate  
490 including *exaA* and *acsA* did not show increases in AP activity in response to 1% ethanol  
491 (**Table 1**) indicating that ethanol catabolism was essential for PhoB activation in mono-  
492 culture. We hypothesized that ethanol catabolism led to increased levels of acetyl  
493 phosphate, a non-canonical phosphate donor of transcription factors including PhoB, but  
494 neither acetyl phosphate biosynthesis mediated by AckA nor catabolism by Pta was  
495 necessary for ethanol-induced PhoB activity (**Table 1**) [82-85]. Mutants defective in the  
496 ExaA-dependent ethanol catabolic pathway showed only weak 5-MPCA production on *C.*  
497 *albicans* lawns and the phenotype could be complemented (**Table 1**). Together these  
498 data suggest that ethanol catabolism plays a role in PhoB activation, and that additional  
499 pathways for ethanol catabolism may be present in co-culture conditions. Further

500 investigation is required to determine the mechanism for ethanol induction of PhoB  
501 activity, but these results demonstrate ethanol stimulation and PhoB activation  
502 participated in non-linear but intersecting pathways.

503

#### 504 **The *C. albicans* low phosphate response was more active in *adh1*Δ/Δ than in WT**

505         Given the differences in *P. aeruginosa* PhoB activity in co-culture with *C. albicans*  
506 WT compared *adh1*Δ/Δ, we sought to understand if *C. albicans* also experienced  
507 differences in phosphate availability by examining its low phosphate response. In *C.*  
508 *albicans*, low phosphate induces activity of the transcription factor Pho4 which regulates  
509 genes involved in phosphate acquisition as well as the homeostasis of cations (e.g. iron),  
510 tolerance of stresses including ROS and arsenic, and fitness in murine models [86-90].  
511 Pho4 regulates 133 genes that were identified using transcriptomics as differentially  
512 expressed both between *C. albicans* WT and *pho4*Δ/Δ in low phosphate and between *C.*  
513 *albicans* WT in high and low phosphate [86] (see **Supp. Dataset 4** for gene list). We found  
514 that Pho4-regulated genes were over-represented in DEGs between co-cultures of *C.*  
515 *albicans* WT and *C. albicans adh1*Δ/Δ (logFC > 1, p < 0.05) (hypergeometric test p =  
516 1.9x10<sup>-3</sup>). Of the top ten most differentially expressed genes between *C. albicans* WT and  
517 *pho4*Δ/Δ in low phosphate determined by Ikeh *et al.* [86], seven were also strongly  
518 differentially expressed (logFC > 2) in co-cultures of *C. albicans* WT with *P. aeruginosa*  
519 compared to *C. albicans adh1*Δ/Δ with *P. aeruginosa* including a secreted phospholipase  
520 (*PHO100*) and two secreted phosphatases (*PHO112* and *PHO113*) (**Fig. 6A**, black bars).  
521 Given the strong differential expression of these phosphatases, we assessed  
522 phosphatase activity using BCIP supplementation as done for *P. aeruginosa*. Consistent



523 with the transcriptional data, higher phosphatase activity was observed in *C. albicans*  
524 *adh1Δ/Δ* compared to *C. albicans* WT in the presence (**Fig. 6B**) of *P. aeruginosa*.

525 To determine if the activation of the *C. albicans* low phosphate response in  
526 *adh1Δ/Δ* in co-culture was a consequence of competition for phosphate with *P.*  
527 *aeruginosa*, we examined *C. albicans* gene expression and phosphatase activity in mono-  
528 culture. The same Pho4-regulated genes that were DEGs in co-culture were also DEGs  
529 between *C. albicans* WT and *C. albicans adh1Δ/Δ* even in the absence of *P. aeruginosa*  
530 (**Fig. 6C**), and higher phosphatase activity was evident in *C. albicans adh1Δ/Δ* compared  
531 to *C. albicans* WT or the complemented strain *adh1Δ/ADH1* in mono-culture by BCIP  
532 assay (**Fig 6D**). As a control, we assayed *C. albicans pho4Δ/Δ*. The low amounts of  
533 phosphatase activity seen for *C. albicans* WT and *adh1Δ/ADH1* was distinguishable from  
534 the absence of phosphatase in *pho4Δ/Δ* indicating that that phosphatase activity was  
535 Pho4-dependent (**Fig 6D**). The high Pho4 response in *C. albicans adh1Δ/Δ*, evident even  
536 in mono-culture, suggested that Adh1 activity impacts *C. albicans* phosphate access,  
537 requirements or Pho4 regulation. Since phosphatases produced by *C. albicans* as part of  
538 its low phosphate response are secreted, we hypothesized that their production would  
539 affect *P. aeruginosa* in co-culture, perhaps by providing access to phosphate freed from  
540 macromolecules and this model is discussed further below.

541  
542 **In co-culture with ethanol-producing *C. albicans*, *P. aeruginosa* PhoB-plays**  
543 **independent roles in phosphate scavenging and phenazine-mediated antagonism**

544 PhoB was important for *P. aeruginosa* growth in co-culture as  $\Delta phoB$  formed fewer  
545 CFUs on *C. albicans* WT than *P. aeruginosa* WT (**Fig. 6E**). Notably, a comparable number

546 of *P. aeruginosa* CFUs were recovered from *P. aeruginosa* WT and  $\Delta phz$  suggesting the  
547 lack of phenazines was not a major reason for decreased CFU formation in  $\Delta phoB$  but,  
548 likely, phosphate acquisition defects explained decreased growth in co-culture (**Fig. 6E**).  
549 The defect in CFU formation by  $\Delta phoB$  compared to WT or  $\Delta phz$  held true on *C. albicans*  
550 with a complemented copy of *ADH1*. On the *C. albicans adh1 $\Delta/\Delta$*  mutant, however, *P.*  
551 *aeruginosa* CFUs were similar for WT,  $\Delta phoB$ , and  $\Delta phz$  suggesting that in the absence  
552 of *C. albicans* Adh1 activity, *P. aeruginosa* PhoB, and its roles in phosphate acquisition  
553 or phenazine production, were not necessary for fitness. This finding is consistent with  
554 the model that elevated phosphatase production by the *C. albicans adh1 $\Delta/\Delta$*  (**Fig. B and**  
555 **D**) may eliminate the need for *P. aeruginosa* to produce phosphatases.

556 *C. albicans* CFUs were enumerated from the same co-cultures. Consistent with  
557 previous reports on the antifungal properties of the phenazine 5-MPCA [25, 27], *C.*  
558 *albicans* had lower CFUs upon co-culture with *P. aeruginosa* WT compared to when co-  
559 cultured with  $\Delta phoB$  or  $\Delta phz$  (**Fig. 6F**). In *C. albicans adh1 $\Delta/\Delta$*  co-cultures that did not  
560 support *P. aeruginosa* PhoB-dependent phenazine production (**Fig. 4**), *C. albicans* CFUs  
561 were not different between co-cultures with *P. aeruginosa* WT,  $\Delta phoB$  or  $\Delta phz$ .

562  
563 ***P. aeruginosa* and *C. albicans* asynchronously activate their low phosphate**  
564 **responses dependent on *C. albicans* Adh1-mediated ethanol production**

565 While *P. aeruginosa* had higher activity of its low phosphate responsive regulator  
566 PhoB in the presence of ethanol-producing *C. albicans* WT (**Fig. 3G and 4A**), *C. albicans*  
567 had higher activity of its low phosphate responsive transcription factor Pho4 in *C. albicans*  
568 *adh1 $\Delta/\Delta$*  (**Fig. 6**). To explicitly examine the relationship between the *P. aeruginosa* and

569 *C. albicans* low phosphate responses in co-culture we performed a cross-species  
570 correlation analysis on the co-culture gene expression data for a subset of *P. aeruginosa*  
571 PhoB-regulated genes (clique 3) and a subset of *C. albicans* Pho4-regulated genes  
572 (those also DEGs between *C. albicans* WT and *adh1Δ/Δ* shown in **Fig. 6A**). There was a  
573 striking pattern of inverse correlations between *P. aeruginosa* PhoB-regulated genes and  
574 *C. albicans* Pho4-regulated genes (**Fig. 7A**, upper triangle). In addition to being of high  
575 magnitudes, many same-species correlations (white background) as well as cross-  
576 species correlations (grey background) were statistically significant as indicated by circles  
577 (**Fig. 7A**, lower triangle). Of the two groups of strongly correlated genes, the one  
578 composed entirely of *P. aeruginosa* genes was more highly expressed in co-culture of *P.*  
579 *aeruginosa* and *C. albicans* WT than co-cultures of *P. aeruginosa* and *C. albicans*  
580 *adh1Δ/Δ*. Conversely, the group composed of mostly *C. albicans* genes and including the  
581 four *P. aeruginosa* phosphate transport-associated genes was more highly expressed in  
582 co-cultures of *P. aeruginosa* and *C. albicans adh1Δ/Δ* than in co-cultures of *P. aeruginosa*  
583 and *C. albicans* WT (**Fig. 7A**, right-hand barplot).

584 The asynchronous and seemingly inverse activations of the *P. aeruginosa* and *C.*  
585 *albicans* low phosphate responses in co-culture, in combination with the differences in  
586 requirement for PhoB on *C. albicans* WT versus *adh1* (**Fig. 6E and 6F**), suggest that the  
587 two microbes were not responding to common environmental stimuli but rather that they  
588 influenced each other. The increased phosphatase activity in *C. albicans adh1Δ/Δ* even  
589 in the absence of *P. aeruginosa* (**Fig. 6D**) suggested that activation of the *C. albicans* low  
590 phosphate response may have inhibited activation of the *P. aeruginosa* low phosphate  
591 response providing negative regulation that, in concert with the lack of ethanol production,

592 led to low PhoB activity in *P. aeruginosa* in co-culture with *C. albicans adh1Δ/Δ* and a  
593 consequent lack of 5-MPCA-derived red pigment accumulation (**Fig. 7B**).

594

## 595 **Discussion**

### 596 **Co-culture transcriptomics explored dynamic microbe-microbe interactions**

597 Whole genome transcriptional profiling has been used as a powerful tool to explore  
598 microbe-microbe interactions. By considering the gene expression patterns of both *P.*  
599 *aeruginosa* and *C. albicans* in co-culture, we found that the production of secreted  
600 phosphatases, a common good, was anti-correlated between *P. aeruginosa* and *C.*  
601 *albicans* depending on the ability of *C. albicans* to produce ethanol (**Fig 7A**). This  
602 interesting observation suggests that the two microbes interact differently in high and low  
603 phosphate environments and the dynamics of phosphate sensing, transport and  
604 enzymatic release by one organism can influence the microbial behavior of the other in  
605 complex ways that lead to the emergence of conditional antagonism.

606 Exploration of co-culture expression data sparked the investigation showing that  
607 signals of biologically-available phosphate and sub-inhibitory concentrations of ethanol  
608 were integrated into a PhoB-coordinated transcriptional response in *P. aeruginosa*.  
609 Interestingly, analysis of *C. albicans* gene expression in co-culture suggested these  
610 stimuli may be linked as well. Inorganic phosphate is well established as a negative  
611 regulator of the low phosphate response via the phosphate transport complex in *P.*  
612 *aeruginosa*, and here we show that ethanol, a common microbial fermentation product,  
613 positively regulated the *P. aeruginosa* low phosphate response specifically promoting the  
614 expression of secreted phosphatases, phospholipases, and antifungal phenazines. While

615 these enzymes are only a subset of the PhoB regulon, PhoB activity and their expression  
616 were critical for *P. aeruginosa* in co-culture. In co-culture, this small armory of enzymes  
617 could make phosphate available by actively sequestering it away from neighboring  
618 microbes or by means of direct antagonism.

619

620 **eADAGE-based analysis identified novel transcriptional signals and increased**  
621 **interpretability of *P. aeruginosa* co-culture transcriptomics**

622 The eADAGE model comprises 600 data-derived, weighted gene sets called  
623 signatures that are defined by the features of a hidden layer in an ensemble denoising  
624 autoencoder neural network ([www.adage.greenelab.com](http://www.adage.greenelab.com)). The signatures were learned  
625 from an unlabeled compendium of *P. aeruginosa* gene expression data and thus were  
626 defined solely on gene expression relationships rather than metadata. Fortuitously, many  
627 eADAGE signatures are enriched in one or more KEGG pathways [64] but others are not  
628 enriched in any. In this way, eADAGE provides an opportunity to expand the breadth of  
629 gene expression analysis beyond previously characterized pathways.

630 Despite our incomplete understanding of condition-dependent PhoB activity, we  
631 were able to identify a novel signal for a subset of PhoB-regulated genes through  
632 transcriptional profiling of *P. aeruginosa* grown in co-culture with *C. albicans* using  
633 eADAGE. Representation of the RNA-Seq data in reduced feature space yielded 48  
634 differentially active signatures that distilled gene expression patterns amongst complex  
635 and dynamic systems. By analyzing eADAGE node activity, we were able to identify  
636 subtle signals for which genes did not individually meet the cutoffs for DEGs and whose  
637 pathways were not detected through over-representation analysis. Subtle changes in

638 gene expression could still have dramatic phenotypic effects; for example, although the  
639 ethanol catabolism genes were not included in any enriched pathway, they were present  
640 in eADAGE differentially active signatures, and we identified ExaA-based ethanol  
641 catabolism as a potential regulator of the PhoB-mediated ethanol response including 5-  
642 MPCA production [91, 92]. Similarly, we observed enrichment of genes involved in  
643 isoprenoid metabolism which may be indicative of *P. aeruginosa* response to *C. albicans*-  
644 produced farnesol [18, 28, 93].

645         Of the 600 eADAGE signatures, only four contained over-representations of PhoB-  
646 controlled genes and while Node108neg was the only signature that reached the  
647 threshold for DASs, the activities of the other three trended upwards. The dynamics of  
648 co-culture that result in the constant utilization and solubilizing of phosphate differ from  
649 the steady state of phosphate limitation achievable in laboratory conditions. Therefore,  
650 while the low phosphate responses described in functional databases and the  
651 experimentally determined regulon did not show uniform increases in expression of the  
652 relevant genes, the data-defined gene signatures of eADAGE suggested that a tightly  
653 correlated sub-group of the Pho regulon is coordinately upregulated in response to  
654 ethanol-producing *C. albicans*.

655         It is only through the gene expression patterns observed by machine learning  
656 models trained on publicly available *P. aeruginosa* gene expression data that we were  
657 able to identify co-culture induced, ethanol-dependent PhoB activity. Considering the  
658 absence of samples from *P. aeruginosa* grown with *C. albicans* in the compendium of  
659 publicly available data, the distillation of the transcriptional pattern in Node108neg and its  
660 strong ethanol-induced activity in co-culture highlight the power of using unsupervised

661 machine learning methods, in conjunction with a compendium of versatile conditions, to  
662 identify higher order gene expression patterns that are not evident in linear correlation  
663 based analyses and have not yet been manually annotated or systematically described.

664

665 **A conditional antagonism: PhoB-regulated antifungal production was dependent**  
666 **on *C. albicans* ethanol-production and phosphate limitation**

667 Here we have shown that *P. aeruginosa* production of the antifungal phenazine 5-  
668 MPCA is dependent on PhoB, but canonical activation of PhoB by de-repression ( $\Delta pstB$ )  
669 is insufficient for 5-MPCA production. We found that *P. aeruginosa* 5-MPCA production  
670 required ethanol, either produced by *C. albicans* or supplied exogenously, as an  
671 additional stimulus. While the mechanism by which ethanol influences PhoB activity is  
672 beyond the scope of this paper, PhoB has been implicated in cases of non-canonical  
673 signaling including auto-phosphorylation, promiscuity with non-canonical histidine  
674 kinases, activation in response to low iron, and stimulation by alternative phospho-donors  
675 such as acetyl-phosphate [35-39, 41, 42, 44, 55, 94-99]. The Pho regulon has been well  
676 characterized for direct PhoB targets [55] but also shown to have additional indirect  
677 targets across various low phosphate media [44]. Co-culture may be an environment  
678 conducive to alternative PhoB stimulation by ethanol. The dual requirement of both  
679 phosphate limitation and ethanol stimulation for *P. aeruginosa* 5-MPCA production  
680 presents a conditionally antagonistic relationship between *P. aeruginosa* and *C. albicans*  
681 where the degree to which the organisms cooperate, compete or target each other  
682 depends on metabolic cues and the abundance of an essential nutrient. Here we have

683 presented a foundational example of an important and emerging paradigm that seeks to  
684 understand how environmental stimuli modulate microbial interactions.

685

## 686 **Materials and Methods**

687

### 688 **Strains and growth conditions**

689 Bacterial strains and plasmids used in this study are listed in **Table S3**. Bacteria  
690 were maintained on LB (lysogeny broth) with 1.5% agar [100]. Yeast strains were  
691 maintained on YPD (yeast peptone dextrose) with 2% agar. Where stated, ethanol (200-  
692 proof) was added to the medium (liquid or molten agar) to a final concentration of 1%.  
693 Planktonic cultures were grown on roller drums at 37°C for *P. aeruginosa* and at 30°C for  
694 *C. albicans*.

695

### 696 **Construction of in-frame deletions, complementation, and plasmids**

697 Construction of plasmids, including in-frame deletion and complementation  
698 constructs, was completed using yeast cloning techniques in *Saccharomyces cerevisiae*  
699 as previously described [101] or Gibson assembly [102, 103]. Primers used for plasmid  
700 construction are listed in **Table S4**. In-frame deletion and single copy complementation  
701 constructs were made using the allelic replacement vector pMQ30 [101]. Promoter fusion  
702 constructs were made using a modified pMQ30 vector with *lacZ-GFP* fusion integrating  
703 at the neutral *att* site on the chromosome. The *pdtA* promoter region 199 bp upstream of  
704 the transcriptional start site (that included a PhoB binding site) was amplified from WT *P.*  
705 *aeruginosa* PA14 gDNA using the Phusion High-Fidelity DNA polymerase with primer



706 tails homologous to the modified pMQ30 ATT KI vector containing tandem *lacZ-gfp*  
707 reporter genes. All plasmids were purified from yeast using Zymoprep™ Yeast Plasmid  
708 Miniprep II according to manufacturer's protocol and transformed into  
709 electrocompetent *E. coli* strain S17/λpir by electroporation. Plasmids were introduced  
710 into *P. aeruginosa* by conjugation and recombinants were obtained using sucrose  
711 counter-selection. Genotypes were screened by PCR and confirmed by sequencing.

712

### 713 **Co-culture and mono-culture and colony biofilms**

714 Co-cultures were inoculated first with 300 μl of a *C. albicans* culture in YPD grown  
715 for ~16 then diluted in dH<sub>2</sub>O to OD<sub>600</sub> = 5, which was bead spread onto YPD plates. *C.*  
716 *albicans* mono-cultures were inoculated with 5 μl of the same cell suspension as spots  
717 on YPD plates. *C. albicans* cultures were incubated 16 hours at 30°C then 24 hours at  
718 room temperature (~23°C). Then, 5 μl of *P. aeruginosa* suspension, prepared from a 5  
719 mL culture in LB grown for ~16 then diluted in dH<sub>2</sub>O to OD<sub>600</sub> = 2.5, was spotted on top  
720 of the *C. albicans* lawns for co-cultures or onto YPD or MOPS minimal medium for mono-  
721 cultures. *P. aeruginosa* cultures were incubated for 16 hours at 30°C. For gradient plates  
722 (described below) 500 μl of *C. albicans* suspension was used and *P. aeruginosa* was  
723 spotted across as 12 evenly spaced 5 μl spots. All images were taken on a Canon EOS  
724 Rebel T6i camera. For visualization of siderophores, pictures were taken under UV light.

725

### 726 **RNA collection**

727 Total RNA was harvested from *P. aeruginosa* mono-cultures, *C. albicans* mono-  
728 cultures and *P. aeruginosa* – *C. albicans* co-cultures grown as described above. All

729 samples were collected as cores from agar plates: cores were taken using a straw, cells  
730 were suspended by shaking agar plugs in 1 mL dH<sub>2</sub>O on the disrupter genie for three  
731 minutes. Cells were spun down and resuspended in 1 mL Trizol and lysed by bead  
732 beating with mixed sizes of silicon beads on the Omni Bead Ruptor. Centrifugation  
733 induced phase separation and RNA was extracted from the aqueous phase where it was  
734 subsequently precipitated out with isopropanol and linear acrylamide. RNA was pelleted,  
735 washed with 70% ethanol and resuspended in nuclease-free dH<sub>2</sub>O then stored at -80°C.  
736 Samples were prepared for sequencing with DNase treatment, ribodepletion and library  
737 preparation in accordance with Illumina protocols. Samples were barcoded and  
738 multiplexed in a NextSeq run for a total of 4.7x10<sup>8</sup> reads.

739

#### 740 **RNA-Seq Processing**

741 Reads were processed using the CLC Genomics Workbench wherein reads were  
742 trimmed and filtered for quality using default parameters. For co-cultures, reads were first  
743 aligned to the *P. aeruginosa* UCPBB\_PA14 genome from [www.pseudomonas.com](http://www.pseudomonas.com).  
744 Then, all unaligned reads were aligned to *C. albicans* SC5314 genome Assembly 22 from  
745 [www.candidagenome.org](http://www.candidagenome.org). For mono-cultures reads were only aligned to their appropriate  
746 reference. Results were exported from CLC including total counts, CPM and TPM. R was  
747 used for principle component (prcomp, stats library [104]) and consequent plotting  
748 (autoplot, ggplot2 [105]) of gene expression TPM data.

749 R was also used for differential gene expression analysis, EdgeR was used to  
750 process both *P. aeruginosa* and *C. albicans* gene expression separately [106].  
751 Generalized linear models with mixed effect data design matrices were used to calculate

752 fold-changes, p-values and FDRs for each comparison of interest. Volcano plots using  
753 EdgeR output ( $\log_2$ fold-change and  $-\log_{10}(\text{FDR})$ ) were made in R as well (ggplot2 [105]).

754 Pathway over-representation analysis was carried out using *P. aeruginosa*- and *C.*  
755 *albicans*-associated KEGG pathways (ADAGEpath [64] and KEGGREST [107]) and  
756 calculated using a one-sided hypergeometric test (phyper, stats) with Bonferroni  
757 correction for multiple hypothesis testing (p.adjust, stats) [104].

758

### 759 **Accession Number**

760 Data for our RNA-Seq analysis of *P. aeruginosa* and *C. albicans* gene expression  
761 in co-culture has been uploaded to the GEO repository  
762 (<https://www.ncbi.nlm.nih.gov/geo/>) with the accession number GSE148597.

763

### 764 **eADAGE analysis**

765 We performed an eADAGE analysis in accordance with the workflow published in  
766 the R package [64]. Briefly, each gene expression profile in counts per million (CPM) from  
767 our RNA-Seq experiment was used to calculate a lower dimensional representation of the  
768 data called a signature activity profile. Then, differentially active signatures were identified  
769 by linear model. (limma, stats) This resulted in a set of signatures that were significantly  
770 different, but which may have been redundant. We applied pareto front optimization of  
771 minimal p-value and maximal absolute fold-change to arrive at a set of candidate  
772 signatures that exhibit statistically significant differences and less redundancy. Heatmaps  
773 show gene expression (CPM) or eADAGE signature activity scaled by feature (gene or

774 signature) and are hierarchically clustered by the complete method using Euclidean  
775 distance by sample (ComplexHeatmap [108]).

776

### 777 **NanoString analysis**

778 NanoString analysis was done using RNA isolated as above (without DNase  
779 treatment) and 100 ng were applied to the codeset PaV5 (sequences for probesets used  
780 in this study in **Supplemental Dataset 4**) and processed as previously reported [2].  
781 Counts were normalized to the geometric mean of spiked-in technical controls and five  
782 housekeeping genes (*ppiD*, *rpoD*, *soj*, *dnaN*, *pepP*, *dapF*). Normalized counts were used  
783 for heatmap construction and fold-change calculations.

784

### 785 **Measurement of $\beta$ -galactosidase in reporter fusion strains.**

786 For co-culture promoter activity assays, *C. albicans* lawns were grown as  
787 described for RNA-Seq. *P. aeruginosa* was inoculated onto two filters placed on the *C.*  
788 *albicans* lawns to allow for interaction through diffusible compounds but separation of  
789 cells for quantification of promoter activity. *P. aeruginosa* cells were suspended in PBS  
790 by disrupter genie and diluted to  $OD_{600} = 0.05$ .  $\beta$ -Galactosidase ( $\beta$ -Gal) activity was  
791 measured as described by Miller [109].  $\beta$ -Gal activity was measured in *P. aeruginosa* WT  
792 and normalized to that in  $\Delta$ *phoB* which acted as a negative control.

793

### 794 **pNPP**

795 For quantification of AP activity, we used a colorimetric assay using p-Nitrophenyl  
796 phosphate (pNPP) (NEB) as a substrate. Briefly, 5  $\mu$ l of *P. aeruginosa* overnight culture

797 were inoculated onto MOPS 0.7 mM phosphate agar plates with and without 1% ethanol  
798 and incubated at 37°C for 16 hours. Colony biofilms were collected from filters as  
799 described for the promoter fusion assays. 100 µl of cell suspension was added to 900 µl  
800 of 0.01 M Tris-HCl pH 8 buffer. After the addition of 25 µl 0.1% SDS and 50 µl chloroform  
801 cells incubated at 30 ° for 10 minutes. 30 µl of the aqueous phase was transferred to a  
802 96 well plate containing 15 µl reaction buffer (5 µl 0.5 mM MgCl<sub>2</sub> and 10 µl 1 M Tris pH  
803 9.5) where 5 µl pNPP was added [36]. After 30 minutes OD<sub>405</sub> was read on a plate reader  
804 (SpectraMax M2) and AP activity units were calculated as  $\frac{\Delta A_{405} * ml}{10.67 * min} * \frac{dilution}{A_{600}}$  where 10.67  
805 is the extinction coefficient ,normally 18.5, adjusted to path length of the microtiter dish.

806

### 807 **Gradient plates**

808 Phosphate gradient plates were made similarly to previously reported methods of  
809 creating pH gradient plates [110]. For YPD-based phosphate gradients plates used for  
810 co-cultures, first 32 mL of molten YPD+10mM potassium phosphate pH6 were poured  
811 into a 10 cm square petri dish (Corning, BP124-05) that rested in a custom 3D-printed  
812 prop that held the plate slanted at 30°. Once the bottom layer had solidified, the plate was  
813 laid flat and 32 mL of molten YPD without phosphate supplementation agar were poured  
814 atop. For MOPS-based gradient plates used for *P. aeruginosa* mono-cultures the  
815 procedure was the same except the first layer was 32 mL MOPS minimal media with 1  
816 mM phosphate and the top layer was 32 mL MOPS minimal medium 0.4 mM phosphate.  
817 When needed, BCIP (Sigma-Aldrich #1158002001) (stock solution 60 mg/10 mL DMF)  
818 was added to a final molarity of 6 nM.

819

## 820 **Acknowledgements**

821 Research reported in this publication was supported by grants from the National Institutes  
822 of Health to D.A.H. (R01 GM108492 to D.A.H) and HOGAN19G0, and NSF 1458359  
823 (D.A.H. and G.D.). Support for G.D. came in part from 5T32GM008704 (G.D.). NIGMS  
824 P20GM113132 through the Molecular Interactions and Imaging Core (MIIC).  
825 STANTO19R0 from the Cystic Fibrosis Foundation and NIDDK P30-DK117469  
826 (Dartmouth Cystic Fibrosis Research Center). RNA-Seq and NanoString were carried out  
827 at Dartmouth Medical School in the Genomics Shared Resource, which was established  
828 by equipment grants from the NIH and NSF and is supported in part by a Cancer Center  
829 Core Grant (P30CA023108) from the National Cancer Institute. We also thank Casey  
830 Greene and Alex Lee for a critical reading of the manuscript, Alan Collins for the gradient  
831 plate prop and Dianne Newman and Marian Llamas for generously sending strains.  
832

833 **Table 1.** Phenotypes for 5MPCA-accumulation in co-culture *C. albicans* WT by *P.*  
 834 *aeruginosa* strains and ethanol-induced alkaline phosphatase (AP) activity in  
 835 monoculture. AP activity was visualized in colonies on agar containing by BCIP. *P.*  
 836 *aeruginosa* mutants were defective in ppGpp-dependent AlgU and DksA signaling,  
 837 ethanol catabolism, the kinase KinB and sigma factor Vrel, which are known to  
 838 influence PhoB activity, acetyl-phosphate metabolism and ethanol catabolism.  
 839

| Genotype                          | <i>P.a.</i><br>5MPCA on<br><i>C. albicans</i><br>WT | <i>P.a.</i> AP<br>induction<br>by<br>ethanol |
|-----------------------------------|-----------------------------------------------------|----------------------------------------------|
| WT                                | Yes                                                 | Yes                                          |
| $\Delta phoB$                     | No                                                  | No                                           |
| $\Delta algU$                     | Yes                                                 | Yes                                          |
| $\Delta dksA$                     | Yes                                                 | Yes                                          |
| $\Delta relA$                     | Yes                                                 | Yes                                          |
| $\Delta relA\Delta spoT$          | Yes                                                 | Yes                                          |
| $\Delta kinB$                     | No                                                  | Yes                                          |
| $\Delta kinB+kinB$                | Yes                                                 | Yes                                          |
| $\Delta mucB$                     | Yes                                                 | Yes                                          |
| $\Delta vreI$                     |                                                     | Yes                                          |
| $\Delta vreR$                     |                                                     | Yes                                          |
| $\Delta vreA$                     |                                                     | Yes                                          |
| $\Delta vreI\Delta phoB$          |                                                     | No                                           |
| $\Delta exaA$                     | No                                                  | No                                           |
| $\Delta exaA+exaA$                | Yes                                                 | Yes                                          |
| $acsA::TnM$                       | Yes                                                 | No                                           |
| $\Delta ackA$                     | Yes                                                 | Yes                                          |
| $\Delta ackA\Delta pta$           | Yes                                                 | Yes                                          |
| $\Delta ackA\Delta pta\Delta phz$ | No                                                  | Yes                                          |

840

## 841 Figure Legends

842 **Figure 1. In co-culture of *C. albicans* (*C.a.*) and *P. aeruginosa* (*P.a.*), *C.a.*-**  
843 **produced ethanol stimulates *P.a.* to produce 5-MPCA and transcriptional**  
844 **responses ensue from both organisms.** A) Co-cultures of *P.a.* wild type (WT) and  
845 mutants lacking phenazine biosynthesis operons ( $\Delta phz1$  or  $\Delta phz2$ ) were inoculated onto  
846 72 h-old lawns of *C.a.* wild type (WT), *C.a. adh1* $\Delta/\Delta$  and *adh1* $\Delta/\Delta$  reconstituted with  
847 *ADH1* (*adh1* $\Delta/ADH1$ ). The red pigmentation indicates production of the phenazine 5-  
848 MPCA by *P.a.*. B) Dual RNA-Seq allowed for parallel analyses of *P.a.* (green) and *C.a.*  
849 (red or pink) mRNA expression profiles from co-culture lawns to survey the effects of  
850 ethanol (green oval) and 5-MPCA (red oval) on gene expression. C) Principle  
851 component analysis (PCA) of TPM (transcripts per kilobase per million reads) from  
852 transcriptome profiles of *P.a.* grown alone (No *C.a.*), *P.a.* grown with *C.a.* WT, and *P.a.*  
853 grown with *C.a. adh1* $\Delta/\Delta$ . D) PCA of gene expression profiles of *C.a.* WT and *C.a.*  
854 *adh1* $\Delta/\Delta$  grown in mono-culture (No *P.a.*) or co-cultures with *P.a.* WT. E) The  
855 expression (z-score of TPM) of genes that differentiate *P.a.* in mono-culture from that  
856 grown in co-culture with *C.a.* WT (absolute value of  $\log_2$ fold-change ( $\log_2FC$ ) > 1 and  
857 false discovery rate (FDR) < 0.05); data for *P.a.* on *C.a. adh1* $\Delta/\Delta$  are also shown. The  
858 red bar indicates genes that are significantly different between *C.a.* WT and *adh1* $\Delta/\Delta$   
859 ( $\log_2FC$  > 1, FDR < 0.05); the grey bar indicates genes that are not. F) Gene expression  
860 (z-score of TPM) of *C.a.* WT and *adh1* $\Delta/\Delta$  grown in mono-culture or in co-culture with  
861 *P.a.*; genes that are significantly different between *C.a.* WT alone or *C.a.* WT with *P.a.*  
862 ( $\log_2FC$  > 1, FDR < 0.05) are shown for all four sample types. Genes that are also  
863 significantly different between *C.a.* WT and *adh1* $\Delta/\Delta$  in the presence of *P.a.* ( $\log_2FC$  > 1,  
864 FDR < 0.05) are indicated by the red bar; the grey bar indicates genes that are not  
865 significantly different in this comparison.

866  
867

868 **Figure 2. Pathways containing differentially expressed genes in *P. aeruginosa***  
869 **and *C. albicans* between co-cultures of *P. aeruginosa* wild type (WT) with *C.***  
870 ***albicans* WT or *adh1* $\Delta/\Delta$ .** DEGs of between *C. albicans* WT and *adh1* $\Delta/\Delta$  from *P.*  
871 *aeruginosa* co-cultures contained over-representations of KEGG pathways for amino  
872 acid metabolism, sulfur (S) metabolism, peroxisomal transport, fatty acid beta-oxidation,  
873 glycolysis, cation (Fe) import, base excision and mismatch DNA repair. Red indicates  
874 higher expression in co-cultures with *C. albicans* WT and blue indicates higher  
875 expression in co-cultures with *C. albicans adh1* $\Delta/\Delta$ . Values indicate  $\log_2$ fold-change. *C.*  
876 *albicans adh1* $\Delta/\Delta$  has higher expression of glycolysis genes and the production of  
877 acetate, which is either secreted or enters into the citric acid cycle (TCA). *P. aeruginosa*  
878 DEGs from the same co-cultures were contained over-representations of KEGG  
879 pathways for phenazine (PCA, PCN, PYO, 1-OH-P, 5-MCPA) biosynthesis and  
880 pyochelin (PCH) biosynthesis pathways. Inset shows increase in siderophore-derived  
881 fluorescence of co-cultures of *P. aeruginosa* with *C. albicans adh1* $\Delta/\Delta$  which is  
882 consistent with increased PCH production. P-values are from hypergeometric over-  
883 representation tests, FDR corrected.

884



885 **Figure 3. eADAGE analysis reveals a subset of the Pho regulon upregulated in *P.***  
886 ***aeruginosa* (*P.a.*) grown on *C. albicans* (*C.a.*) WT compared to that on *C.a.***  
887 ***adh1* $\Delta/\Delta$ .** A) Differentially expressed genes (DEGs) between *P.a.* grown alone or on  
888 *C.a.* WT and *C.a. adh1* $\Delta/\Delta$  for 24 h. Genes that fell within over-represented KEGG  
889 pathways (quorum sensing (orange bar), phenazine biosynthesis (red bar) and  
890 pyochelin biosynthesis (blue bar)) are indicated. Most DEGs do not belong to any of the  
891 three pathways (grey bar). B) Differentially active eADAGE signatures (DASs) for the  
892 same samples shown in A. Signatures in which genes annotated as being involved in  
893 phenazine biosynthesis (red bar), pyochelin biosynthesis (blue bar), or other KEGG  
894 pathways (black bar) are overrepresented are indicated. Signatures that are not over-  
895 represented an any KEGG pathways are indicated by the grey bar. Inset shows the fold-  
896 change for the expression all of the KEGG pathways that are over-represented among  
897 the DASs (# of DASs per KEGG pathway in parentheses); over-representation p-value  
898 shown as circle (Supp. Dataset 3). C) DASs with increased activity in transcriptome  
899 comparisons of *P.a.* grown on *C.a.* WT compared to on *C.a. adh1* $\Delta/\Delta$ . In addition to  
900 DASs with over-representations of pyochelin (blue dots) and phenazine (red dots)  
901 biosynthesis, others over-represent the Pho regulon (Node108n, purple) or contain  
902 ethanol catabolism genes (N206n, pink). D) The eADAGE signature with the highest  
903 increase in activity, Node108neg (N108n, purple), contains many genes with increased  
904 expression though not all met the criterion of DEGs individually (logFC > 1, FDR <  
905 0.05). E) DEGs in *P.a.* grown on *C.a.* WT compared to on *C.a. adh1* $\Delta/\Delta$  with expression  
906 levels of PhoB-regulated genes (dark purple) highlighted. F) Network analysis of DEGs  
907 suggest groups of DEGs have correlated patterns across eADAGE: phenazine  
908 biosynthesis (1) is inversely expressed with the low iron response (2) and coordinately  
909 upregulated with the low phosphate response (3) upon exposure to ethanol in co-  
910 culture. Other cliques of DEGs participate in shared biological pathways. See table 2 for  
911 descriptions of all cliques. G) The Pho Clique (3) contains two clades of DEGs with  
912 opposing expression patterns between *P.a.* grown on *C.a.* WT and *C.a. adh1* $\Delta/\Delta$ .

913  
914 **Figure 4. *C. albicans* (*C.a.*) WT induced PhoB-regulated genes in *P. aeruginosa***  
915 **(*P.a.*) compared to *C.a. adh1* $\Delta/\Delta$  leading to 5-MPCA production as indicated by red**  
916 **pigment formation.** A) Expression of *P.a.* genes involved in phosphate scavenging,  
917 phenazine biosynthesis (PHZ), ethanol catabolism (EtOH) and inorganic phosphate  
918 transport were measured by NanoString (codesetPAV5) from cells grown with *C.a.*  
919 *adh1* $\Delta/\Delta$ , *C.a.* WT or *C.a.* WT grown on medium with additional 10 mM phosphate.  
920 Expression values are normalized to loading controls and housekeeping genes as  
921 described in methods. Values are z-scored, scaled by gene. Right-hand barplot shows  
922 logFC between *P.a.* WT and *P.a.  $\Delta$ phoB* on *C.a.* WT. The bar is colored red if  
923 expression is PhoB-dependent (logFC *P.a.* WT / *P.a.  $\Delta$ phoB* > 1, FDR < 0.05, else  
924 grey). \* = FDR < 0.05, # = FDR > 0.05. B) Beta-galactosidase activity indicative of  
925 expression of a *pdtA-lacZ* promoter fusion in *P.a.* WT in *P.a.* grown with *C.a.* WT or *C.a.*  
926 *adh1* $\Delta/\Delta$  in the absence or presence of P<sub>i</sub> supplementation, \*, p < 0.05 by ANOVA (n = 3).  
927 C) Red 5-MPCA derivatives produced in co-culture by *P.a.* WT,  *$\Delta$ phoB*,  *$\Delta$ phoR*, and their  
928 complemented derivatives on *C.a.* WT, *adh1* $\Delta/\Delta$ , and *adh1* $\Delta/ADH1$ . D) Red 5-MPCA-  
929 derivatives produced by *P.a.* WT and *P.a.  $\Delta$ pstB* over a gradient of phosphate  
930 concentrations. *P.a.  $\Delta$ pstB* has constitutive PhoB activity. Conversely, *P.a.* WT did not

931 produce 5-MPCA on *Ca. adh1Δ/Δ* at any phosphate concentration, but *P.a. ΔpstB*  
932 induced a small amount of red pigment independent of the phosphate concentration.

933  
934 **Figure 5. Ethanol (EtOH) induced PhoB activity in *P. aeruginosa* (*P.a.*) mono-**  
935 **culture.** A) Alkaline phosphatase (AP) activity visualized by blue color derived from  
936 cleavage of BCIP in MOPS medium with a gradient of phosphate in the absence and  
937 presence of ethanol. The *P.a. Δphz* strain was used to eliminate color differences due to  
938 phenazine production. B) AP activity in the absence and presence of ethanol was  
939 visualized with BCIP added to MOPS agar (0.7 mM phosphate) for *P.a.* wild type,  
940 *ΔphoB* and the *ΔphoB* mutant complemented with a wild-type copy of *phoB* integrated  
941 at the native locus. C) AP activity in cells from colony biofilms grown as in B was  
942 measured using the colorimetric substrate pNPP for *P.a.* WT, *ΔphoB*, and *ΔpstB*, a  
943 strain with constitutive PhoB activity. \*,  $p < 0.01$  by ANOVA ( $n \geq 3$ ). D) Transcripts within  
944 the PhoB regulon involved in phosphate scavenging and inorganic phosphate transport  
945 and genes involved in phenazine production (PHZ) and ethanol catabolism (EtOH) were  
946 measured in cells grown in the absence and presence of ethanol by Nanostring  
947 (codeset PAV5). PhoB-regulated genes increased in expression (top section) and  
948 ethanol catabolism genes (third section) increase in expression and others decrease  
949 (bottom section). Expression values are normalized to loading controls and  
950 housekeeping genes as described in methods. Values are scaled by gene. Right-hand  
951 barplot shows logFC between *P.a.* WT and *P.a. ΔphoB* on MOPS+1%EtOH. The bar is  
952 colored red if expression is PhoB-dependent ( $\log_{2}FC \text{ } P.a. \text{ WT} / P.a. \text{ } \Delta phoB > 1$ , FDR <  
953 0.05, else grey). \*, FDR < 0.05, #, FDR > 0.05. E) PhoB activity and ethanol are both for  
954 5-MPCA production in response to *C.a.* ethanol. *P.a.* WT, *ΔphoB* and *ΔpstB* were grown  
955 on *C.a.* WT, or *C.a. adh1Δ/Δ* in the absence or presence of exogenous ethanol. 5-  
956 MPCA production was rescued by the addition of 1% ethanol to a co-culture of *P.a.*  
957 *ΔpstB* and, to a lesser extent, *P.a.* WT on *C.a. adh1Δ/Δ*. F) Phosphate ( $P_i$ ) and ethanol  
958 (EtOH) are additive stimuli that promote PhoB-dependent expression of AP and  
959 phenazine biosynthesis (PHZ).

960  
961 **Figure 6. The *C. albicans* (*C.a.*) *adh1Δ/Δ* has increased expression of the Pho4-**  
962 **mediated low phosphate response in co-culture that is inversely correlates with**  
963 **PhoB activity in *P. aeruginosa* (*P.a.*).** A) Previously characterized Pho4-regulated  
964 genes [86] including a phospholipase and phosphatases (black bars) were more highly  
965 expressed in *C.a. adh1Δ/Δ* than *C.a.* WT in *P.a.* co-cultures (data shown as z-scores of  
966 TPM). Pho4-dependence is shown in the right-hand barplot as  $\log_2FC \text{ } C.a. \text{ WT} / C.a. \text{ } pho4\Delta/\Delta$   
967 using data from [86]. B) Analysis of phosphatase activity in *C.a.* WT, *C.a.*  
968 *adh1Δ/Δ*, the complemented strain *adh1Δ/ADH1* or *pho4Δ/Δ* using the colorimetric  
969 phosphatase BCIP substrate in agar. More phosphatase activity was observed in *C.a.*  
970 *adh1Δ/Δ* than in strains with *ADH1* in in co-culture with *P.a.* C) The same Pho4-  
971 regulated genes as shown in A were also more highly expressed in *C.a. adh1Δ/Δ* than  
972 *C.a.* WT in mono-cultures. Right-hand barplot shows Pho4-dependence as in A. D)  
973 More phosphatase activity was observed in *C.a. adh1Δ/Δ* than in strains with *ADH1* in in  
974 mono-culture. . As predicted, phosphatase activity is not evident in the *C.a. pho4Δ/Δ*  
975 strain. Phosphatase activity visualized via BCIP as in B. E) Number of CFUs of *P.a.* WT,  
976 *ΔphoB* or *Δphz* after co-culture for 72 h with *C.a.* WT, *C.a. adh1Δ/Δ* *C.a. adh1Δ/ADH1*.

977 *P.a. ΔphoB* and *Δphz* had significantly fewer CFUs on *C.a.* strains with high ethanol  
978 production (WT and *adh1Δ/ADH1*), but not *C.a. adh1Δ/Δ*. F) In the same samples  
979 analyzed in A, *C.a.* CFU formation was assessed. *C.a.* WT or *C.a. adh1Δ/ADH1* strains  
980 had increased fitness in-culture with *P.a. ΔphoB* or *P.a. Δphz* compared to with *P.a.* WT.  
981 For *C.a. adh1Δ/Δ*, there were no differences in CFU formation when co-cultured with  
982 *P.a.* WT, *ΔphoB* or *Δphz*.

983

984 **Figure 7. *P. aeruginosa* (*P.a.*) PhoB affects both *P.a.* and *C. albicans* (*C.a.*) fitness**  
985 **in co-culture through its control of phenazine production and phosphate**

986 **acquisition.** A) Pearson correlation analysis between *P.a.* (green annotations) and *C.a.*  
987 (orange annotations) low phosphate-responsive genes from co-cultures of *P.a.* WT with  
988 either *C.a.* WT or *adh1Δ/Δ*. Largely inverse relationships between *P.a.* PhoB- and *C.a.*  
989 Pho4-regulated genes is apparent. Log<sub>2</sub>FC (p<0.05) between *P.a.* with either *C.a.* WT  
990 or *C.a. adh1Δ/Δ* is shown in the right-hand bar plot. Lower half of correlogram shows  
991 which correlations are significant (filled circles) and indicates correlation values by color  
992 intensity relative to scale. Same species comparisons have white backgrounds and  
993 cross-species correlations have grey backgrounds. B) Model of PhoB activity in *P.a.*-  
994 *C.a.* co-cultures. PhoB mediates the conditional production of the antagonistic,  
995 antifungal phenazine 5-MPCA in response to phosphate and fungal ethanol  
996 production. \*\*,p<0.01 by ANOVA.

997

998

999 **Supplemental Figure Legend**

1000

1001 **Figure S1. Red pigment formation is dependent on phenazine biosynthesis**  
1002 **genes, phenazine transport genes and quorum sensing (QS) pathways in *P.***  
1003 ***aeruginosa* (*P.a.*).** A) Co-cultures of *P.a.* wild type (WT) and mutants lacking genes  
1004 involved in phenazine biosynthesis were inoculated onto lawns of *C.a.* (WT), *C.a.*  
1005 *adh1Δ/Δ* and *adh1Δ/Δ* reconstituted with *ADH1* then incubated for 24 h. *P.a.* 5-MPCA  
1006 phenazine biosynthesis (evident by red color) was not observed with the *ΔphzM* but was  
1007 still produced by *ΔphzS* and *ΔphzH*. 5-MPCA production was dependent on the  
1008 oxidative stress response gene *soxR* and 5-MPCA transport complex *mexGHI-ompD*.  
1009 For all *P.a.* strains, 5-MPCA was only produced on *C.a.* with intact *ADH1*. B) Co-  
1010 cultures of *P.a.* wild type (WT) and mutants lacking genes involved in quorum sensing  
1011 were inoculated onto lawns of *C.a.* (WT), *C.a. adh1Δ/Δ* and *adh1Δ/Δ* reconstituted with  
1012 *ADH1* then incubated for 48 h. *P.a.* mutants defective in QS pathways (*ΔlasR*, *ΔrhIR*,  
1013 *ΔpqsR*, *ΔpqsA*) form less red pigment than *P.a.* WT on *C.a.* WT and no strains form red  
1014 pigment on *C.a. adh1Δ/Δ*. C) Gene expression of *P.a.* LasR (blue), RhIR (orange) and  
1015 PqsR (red) regulated genes had heterogeneous expression with genes both up and  
1016 down regulated. D) Red pigment formation being dependent on QS pathways of RhIR  
1017 and PqsR is consistent with integration of QS with PhoB via the integrative quorum  
1018 sensing (IQS) pathway in which low phosphate triggers PhoB activity which influences

1019 PqsR and RhlR to act, via their cognate autoinducers PQS and C4-HSL respectively, in  
1020 a regulatory cascade eventually promoting the transcription of phenazine biosynthesis  
1021 genes (*phzA1-G1*, *phzA2-G2*) and consequent phenazine carboxylic acid (PCA)  
1022 production. PhoB and QS have also been reported to effect the expression of  
1023 phenazine modification genes *phzM*, *phzS*, and *phzH* necessary for the conversion of  
1024 PCA to 5-methyl-phenazine-1-carboxylic acid (5-MPCA), pyocyanin, phenazine-1-  
1025 carboxamide (PCN) and 1-hydroxy-phenazine (1-OH-phenazine) [74].  
1026

## 1027 **References**

1028

- 1029 1. Hughes WT, Kim HK. Mycoflora in cystic fibrosis: some ecologic aspects of  
1030 *Pseudomonas aeruginosa* and *Candida albicans*. Mycopathol Mycol Appl.  
1031 1973;50(3):261-9. Epub 1973/07/31. PubMed PMID: 4199669.
- 1032 2. Grahl N, Dolben EL, Filkins LM, Crocker AW, Willger SD, Morrison HG, et al.  
1033 Profiling of bacterial and fungal microbial communities in cystic fibrosis sputum using  
1034 RNA. mSphere. 2018;3(4):e00292-18. doi: 10.1128/mSphere.00292-18. PubMed PMID:  
1035 30089648.
- 1036 3. Azoulay E, Timsit J-F, Tafflet M, de Lassence A, Darmon M, Zahar J-R, et al.  
1037 *Candida* colonization of the respiratory tract and subsequent *Pseudomonas* ventilator-  
1038 associated pneumonia. Chest. 2006;129(1):110-7. doi:  
1039 <https://doi.org/10.1378/chest.129.1.110>.
- 1040 4. Falleiros de Padua RA, Norman Negri MF, Svidzinski AE, Nakamura CV,  
1041 Svidzinski TI. Adherence of *Pseudomonas aeruginosa* and *Candida albicans* to urinary  
1042 catheters. Rev Iberoam Micol. 2008;25(3):173-5. Epub 2008/09/13. doi: 10.1016/s1130-  
1043 1406(08)70040-8. PubMed PMID: 18785788.
- 1044 5. Gupta N, Haque A, Mukhopadhyay G, Narayan RP, Prasad R. Interactions  
1045 between bacteria and *Candida* in the burn wound. Burns. 2005;31(3):375-8. doi:  
1046 <https://doi.org/10.1016/j.burns.2004.11.012>.
- 1047 6. Nseir S, Jozefowicz E, Cavestri B, Sendid B, Di Pompeo C, Dewavrin F, et al.  
1048 Impact of antifungal treatment on *Candida*–*Pseudomonas* interaction: a preliminary  
1049 retrospective case–control study. Intensive Care Med. 2007;33(1):137-42. doi:  
1050 10.1007/s00134-006-0422-0.
- 1051 7. Pierce GE. *Pseudomonas aeruginosa*, *Candida albicans*, and device-related  
1052 nosocomial infections: implications, trends, and potential approaches for control. J Ind  
1053 Microbiol Biotechnol. 2005;32(7):309-18. doi: 10.1007/s10295-005-0225-2.
- 1054 8. Kerr JR. Suppression of fungal growth exhibited by *Pseudomonas aeruginosa*. J  
1055 Clin Microbiol. 1994;32(2):525-7. PubMed PMID: 8150966.
- 1056 9. Bakare N, Rickerts V, Bargon J, Just-Nubling G. Prevalence of *Aspergillus*  
1057 *fumigatus* and other fungal species in the sputum of adult patients with cystic fibrosis.

- 1058 Mycoses. 2003;46(1-2):19-23. Epub 2003/02/18. doi: 10.1046/j.1439-  
1059 0507.2003.00830.x. PubMed PMID: 12588478.
- 1060 10. Kaleli I, Cevahir N, Demir M, Yildirim U, Sahin R. Anticandidal activity of  
1061 *Pseudomonas aeruginosa* strains isolated from clinical specimens. Mycoses.  
1062 2007;50(1):74-8. Epub 2007/02/17. doi: 10.1111/j.1439-0507.2006.01322.x. PubMed  
1063 PMID: 17302753.
- 1064 11. Bauernfeind A, Bertele RM, Harms K, Horl G, Jungwirth R, Petermuller C, et al.  
1065 Qualitative and quantitative microbiological analysis of sputa of 102 patients with cystic  
1066 fibrosis. Infection. 1987;15(4):270-7. Epub 1987/07/01. doi: 10.1007/bf01644137.  
1067 PubMed PMID: 3117700.
- 1068 12. Bandara H, Yau JYY, Watt RM, Jin LJ, Samaranayake LP. *Pseudomonas*  
1069 *aeruginosa* inhibits *in-vitro* *Candida* biofilm development. BMC Microbiol.  
1070 2010;10(1):125. doi: 10.1186/1471-2180-10-125.
- 1071 13. Bergeron AC, Seman BG, Hammond JH, Archambault LS, Hogan DA, Wheeler  
1072 RT. *Candida albicans* and *Pseudomonas aeruginosa* interact to enhance virulence of  
1073 mucosal infection in transparent zebrafish. Infect Immun. 2017;85(11):e00475-17. doi:  
1074 10.1128/iai.00475-17.
- 1075 14. Brand A, Barnes JD, Mackenzie KS, Odds FC, Gow NAR. Cell wall glycans and  
1076 soluble factors determine the interactions between the hyphae of *Candida albicans* and  
1077 *Pseudomonas aeruginosa*. FEMS Microbiol Lett. 2008;287(1):48-55. doi:  
1078 10.1111/j.1574-6968.2008.01301.x.
- 1079 15. Lopez-Medina E, Fan D, Coughlin LA, Ho EX, Lamont IL, Reimann C, et al.  
1080 *Candida albicans* Inhibits *Pseudomonas aeruginosa* Virulence through Suppression of  
1081 Pyochelin and Pyoverdine Biosynthesis. PLoS Path. 2015;11(8):e1005129-e. doi:  
1082 10.1371/journal.ppat.1005129. PubMed PMID: 26313907.
- 1083 16. Purschke FG, Hiller E, Trick I, Rupp S. Flexible survival strategies of  
1084 *Pseudomonas aeruginosa* in biofilms result in increased fitness compared with *Candida*  
1085 *albicans*. Molecular & Cellular Proteomics. 2012;11(12):1652-69. doi:  
1086 10.1074/mcp.M112.017673.
- 1087 17. Trejo-Hernández A, Andrade-Domínguez A, Hernández M, Encarnación S.  
1088 Interspecies competition triggers virulence and mutability in *Candida albicans*-  
1089 *Pseudomonas aeruginosa* mixed biofilms. The ISME Journal. 2014;8(10):1974-88. doi:  
1090 10.1038/ismej.2014.53.
- 1091 18. Cugini C, Morales DK, Hogan DA. *Candida albicans*-produced farnesol  
1092 stimulates *Pseudomonas* quinolone signal production in LasR-defective *Pseudomonas*  
1093 *aeruginosa* strains. Microbiology. 2010;156(Pt 10):3096-107. doi:  
1094 10.1099/mic.0.037911-0.
- 1095 19. De Sordi L, Mühlischlegel FA. Quorum sensing and fungal-bacterial interactions  
1096 in *Candida albicans*: a communicative network regulating microbial coexistence and  
1097 virulence. FEMS Yeast Res. 2009;9(7):990-9. doi: 10.1111/j.1567-1364.2009.00573.x.

- 1098 20. Fourie R, Ells R, Swart CW, Sebolai OM, Albertyn J, Pohl CH. *Candida albicans*  
1099 and *Pseudomonas aeruginosa* Interaction, with Focus on the Role of Eicosanoids. *Front*  
1100 *Physiol.* 2016;7(64). doi: 10.3389/fphys.2016.00064.
- 1101 21. Hogan DA, Vik Å, Kolter R. A *Pseudomonas aeruginosa* quorum-sensing  
1102 molecule influences *Candida albicans* morphology. *Mol Microbiol.* 2004;54(5):1212-23.  
1103 doi: 10.1111/j.1365-2958.2004.04349.x.
- 1104 22. Holcombe LJ, McAlester G, Munro CA, Enjalbert B, Brown AJP, Gow NAR, et al.  
1105 *Pseudomonas aeruginosa* secreted factors impair biofilm development in *Candida*  
1106 *albicans*. *Microbiology.* 2010;156(5):1476-86. doi: [https://doi.org/10.1099/mic.0.037549-](https://doi.org/10.1099/mic.0.037549-0)  
1107 [0](https://doi.org/10.1099/mic.0.037549-0).
- 1108 23. McAlester G, O'Gara F, Morrissey JP. Signal-mediated interactions between  
1109 *Pseudomonas aeruginosa* and *Candida albicans*. *J Med Microbiol.* 2008;57(Pt 5):563-9.  
1110 Epub 2008/04/26. doi: 10.1099/jmm.0.47705-0. PubMed PMID: 18436588.
- 1111 24. Sakhtah H, Koyama L, Zhang Y, Morales DK, Fields BL, Price-Whelan A, et al.  
1112 The *Pseudomonas aeruginosa* efflux pump MexGHI-OpmD transports a natural  
1113 phenazine that controls gene expression and biofilm development. *Proc Natl Acad Sci U*  
1114 *S A.* 2016;113(25):E3538-47. doi: 10.1073/pnas.1600424113.
- 1115 25. Morales DK, Jacobs NJ, Rajamani S, Krishnamurthy M, Cubillos-Ruiz JR, Hogan  
1116 DA. Antifungal mechanisms by which a novel *Pseudomonas aeruginosa* phenazine  
1117 toxin kills *Candida albicans* in biofilms. *Mol Microbiol.* 2010;78(6):1379-92. doi:  
1118 10.1111/j.1365-2958.2010.07414.x.
- 1119 26. Morales DK, Grahl N, Okegbe C, Dietrich LEP, Jacobs NJ, Hogan DA. Control of  
1120 *Candida albicans* metabolism and biofilm formation by *Pseudomonas aeruginosa*  
1121 phenazines. *mBio.* 2013;4(1):e00526-12. doi: 10.1128/mBio.00526-12.
- 1122 27. Gibson J, Sood A, Hogan DA. *Pseudomonas aeruginosa-Candida albicans*  
1123 interactions: localization and fungal toxicity of a phenazine derivative. *Appl Environ*  
1124 *Microbiol.* 2009;75(2):504-13. doi: 10.1128/AEM.01037-08.
- 1125 28. Cugini C, Calfee MW, Farrow JM, Morales DK, Pesci EC, Hogan DA. Farnesol, a  
1126 common sesquiterpene, inhibits PQS production in *Pseudomonas aeruginosa*. *Mol*  
1127 *Microbiol.* 2007;65(4):896-906. doi: 10.1111/j.1365-2958.2007.05840.x.
- 1128 29. Chen AI, Dolben EF, Okegbe C, Harty CE, Golub Y, Thao S, et al. *Candida*  
1129 *albicans* ethanol stimulates *Pseudomonas aeruginosa* WspR-controlled biofilm  
1130 formation as part of a cyclic relationship involving phenazines. *PLoS Path.*  
1131 2014;10(10):e1004480-e. doi: 10.1371/journal.ppat.1004480.
- 1132 30. Kerr JR, Taylor GW, Rutman A, Høiby N, Cole PJ, Wilson R. *Pseudomonas*  
1133 *aeruginosa* pyocyanin and 1-hydroxyphenazine inhibit fungal growth. *J Clin Pathol.*  
1134 1999;52(5):385-7. doi: 10.1136/jcp.52.5.385. PubMed PMID: 10560362.
- 1135 31. Harty CE, Martins D, Doing G, Mould DL, Clay ME, Occhipinti P, et al. Ethanol  
1136 stimulates trehalose production through a SpoT-DksA-AlgU-dependent pathway in  
1137 *Pseudomonas aeruginosa*. *J Bacteriol.* 2019;201(12):e00794-18. doi:  
1138 10.1128/JB.00794-18.

- 1139 32. Lewis KA, Baker AE, Chen AI, Harty CE, Kuchma SL, O'Toole GA, et al. Ethanol  
1140 decreases *Pseudomonas aeruginosa* flagellar motility through the regulation of flagellar  
1141 stators. J Bacteriol. 2019;201(18):e00285-19. Epub 2019/05/22. doi: 10.1128/jb.00285-  
1142 19. PubMed PMID: 31109994.
- 1143 33. DeVault JD, Kimbara K, Chakrabarty AM. Pulmonary dehydration and infection in  
1144 cystic fibrosis: evidence that ethanol activates alginate gene expression and induction of  
1145 mucoidy in *Pseudomonas aeruginosa*. Mol Microbiol. 1990;4(5):737-45. doi:  
1146 10.1111/j.1365-2958.1990.tb00644.x.
- 1147 34. Aendekerk S, Diggle SP, Song Z, Hoiby N, Cornelis P, Williams P, et al. The  
1148 MexGHI-OpmD multidrug efflux pump controls growth, antibiotic susceptibility and  
1149 virulence in *Pseudomonas aeruginosa* via 4-quinolone-dependent cell-to-cell  
1150 communication. Microbiology. 2005;151(Pt 4):1113-25. Epub 2005/04/09. doi:  
1151 10.1099/mic.0.27631-0. PubMed PMID: 15817779.
- 1152 35. Bains M, Fernández L, Hancock REW. Phosphate starvation promotes swarming  
1153 motility and cytotoxicity of *Pseudomonas aeruginosa*. Appl Environ Microbiol.  
1154 2012;78(18):6762-8. doi: 10.1128/AEM.01015-12.
- 1155 36. Blus-Kadosh I, Zilka A, Yerushalmi G, Banin E. The effect of *pstS* and *phoB* on  
1156 quorum sensing and swarming motility in *Pseudomonas aeruginosa*. PLoS One.  
1157 2013;8(9):e74444-e. doi: 10.1371/journal.pone.0074444.
- 1158 37. Faure LM, Llamas MA, Bastiaansen KC, de Bentzmann S, Bigot S. Phosphate  
1159 starvation relayed by PhoB activates the expression of the *Pseudomonas aeruginosa*  
1160 *vrel* ECF factor and its target genes. Microbiology. 2013;159(Pt 7):1315-27. doi:  
1161 10.1099/mic.0.067645-0.
- 1162 38. Haddad A, Jensen V, Becker T, Hårdussler S. The Pho regulon influences biofilm  
1163 formation and type three secretion in *Pseudomonas aeruginosa*. Environ Microbiol Rep.  
1164 2009;1(6):488-94. doi: 10.1111/j.1758-2229.2009.00049.x.
- 1165 39. Jensen V, Löns D, Zaoui C, Bredenbruch F, Meissner A, Dieterich G, et al. RhIR  
1166 expression in *Pseudomonas aeruginosa* is modulated by the *Pseudomonas* quinolone  
1167 signal via PhoB-dependent and -independent pathways. J Bacteriol.  
1168 2006;188(24):8601-6. doi: 10.1128/JB.01378-06.
- 1169 40. Lamarche MG, Wanner BL, Crépin S, Harel J. The phosphate regulon and  
1170 bacterial virulence: a regulatory network connecting phosphate homeostasis and  
1171 pathogenesis. FEMS Microbiol Rev. 2008;32(3):461-73. doi: 10.1111/j.1574-  
1172 6976.2008.00101.x.
- 1173 41. Quesada JM, Otero-Asman JR, Bastiaansen KC, Civantos C, Llamas MA. The  
1174 activity of the *Pseudomonas aeruginosa* virulence regulator  $\sigma$ Vrel is modulated by the  
1175 anti- $\sigma$  factor VreR and the transcription factor PhoB. Front Microbiol. 2016;7:1159-. doi:  
1176 10.3389/fmicb.2016.01159.
- 1177 42. Shoriridge VD, Lazdunski A, Vasil ML. Osmoprotectants and phosphate regulate  
1178 expression of phospholipase C in *Pseudomonas aeruginosa*. Mol Microbiol.  
1179 1992;6(7):863-71. doi: 10.1111/j.1365-2958.1992.tb01537.x.

- 1180 43. Zaborin A, Gerdes S, Holbrook C, Liu DC, Zaborina OY, Alverdy JC.  
1181 *Pseudomonas aeruginosa* overrides the virulence inducing effect of opioids when it  
1182 senses an abundance of phosphate. PLoS One. 2012;7(4):e34883-e. doi:  
1183 10.1371/journal.pone.0034883.
- 1184 44. Zaborin A, Romanowski K, Gerdes S, Holbrook C, Lepine F, Long J, et al. Red  
1185 death in *Caenorhabditis elegans* caused by *Pseudomonas aeruginosa* PAO1. Proc Natl  
1186 Acad Sci U S A. 2009;106(15):6327-32. doi: 10.1073/pnas.0813199106.
- 1187 45. Chand NS, Lee JS-W, Clatworthy AE, Golas AJ, Smith RS, Hung DT. The sensor  
1188 kinase KinB regulates virulence in acute *Pseudomonas aeruginosa* infection. J  
1189 Bacteriol. 2011;193(12):2989-99. doi: 10.1128/JB.01546-10.
- 1190 46. Cornforth DM, Dees JL, Ibberson CB, Huse HK, Mathiesen IH, Kirketerp-Møller  
1191 K, et al. *Pseudomonas aeruginosa* transcriptome during human infection. Proc Natl  
1192 Acad Sci U S A. 2018;115(22):E5125-E34. doi: 10.1073/pnas.1717525115.
- 1193 47. Cox CD, Adams P. Siderophore activity of pyoverdinin for *Pseudomonas*  
1194 *aeruginosa*. Infect Immun. 1985;48(1):130.
- 1195 48. Damron FH, Oglesby-Sherrouse AG, Wilks A, Barbier M. Dual-seq  
1196 transcriptomics reveals the battle for iron during *Pseudomonas aeruginosa* acute  
1197 murine pneumonia. Sci Rep. 2016;6(1):39172-. doi: 10.1038/srep39172.
- 1198 49. Damron FH, Qiu D, Yu HD. The *Pseudomonas aeruginosa* sensor kinase KinB  
1199 negatively controls alginate production through AlgW-dependent MucA proteolysis. J  
1200 Bacteriol. 2009;191(7):2285-95. Epub 2009/01/23. doi: 10.1128/JB.01490-08. PubMed  
1201 PMID: 19168621.
- 1202 50. Francis VI, Stevenson EC, Porter SL. Two-component systems required for  
1203 virulence in *Pseudomonas aeruginosa*. FEMS Microbiol Lett. 2017;364(11). doi:  
1204 10.1093/femsle/fnx104.
- 1205 51. Liu PV, Shokrani F. Biological activities of pyochelins: iron-chelating agents of  
1206 *Pseudomonas aeruginosa*. Infect Immun. 1978;22(3):878-90. Epub 1978/12/01.  
1207 PubMed PMID: 103839; PubMed Central PMCID: PMC422240.
- 1208 52. Schmidberger A, Henkel M, Hausmann R, Schwartz T. Influence of ferric iron on  
1209 gene expression and rhamnolipid synthesis during batch cultivation of *Pseudomonas*  
1210 *aeruginosa* PAO1. Appl Microbiol Biotechnol. 2014;98(15):6725-37. Epub 2014/04/23.  
1211 doi: 10.1007/s00253-014-5747-y. PubMed PMID: 24752844.
- 1212 53. Tan J, Doing G, Lewis KA, Price CE, Chen KM, Cady KC, et al. Unsupervised  
1213 extraction of stable expression signatures from public compendia with an ensemble of  
1214 neural networks. Cell Systems. 2017;5(1):63-71.e6. doi: 10.1016/J.CELS.2017.06.003.
- 1215 54. Hogan DA, Kolter R. *Pseudomonas-Candida* interactions: an ecological role for  
1216 virulence factors. Science (New York, NY). 2002;296(5576):2229-32. doi:  
1217 10.1126/science.1070784.
- 1218 55. Bielecki P, Jensen V, Schulze W, Gödeke J, Strehmel J, Eckweiler D, et al.  
1219 Cross talk between the response regulators PhoB and TctD allows for the integration of



- 1220 diverse environmental signals in *Pseudomonas aeruginosa*. *Nucleic Acids Res.*  
1221 2015;43(13):6413-25. doi: 10.1093/nar/gkv599.
- 1222 56. Ching T, Himmelstein DS, Beaulieu-Jones BK, Kalinin AA, Do BT, Way GP, et al.  
1223 Opportunities and obstacles for deep learning in biology and medicine. *Journal of The*  
1224 *Royal Society Interface.* 2018;15(141):20170387. doi: doi:10.1098/rsif.2017.0387.
- 1225 57. Greene CS, Foster JA, Stanton BA, Hogan DA, Bromberg Y. Computational  
1226 approaches to study micorbes and microbiomes. *Pac Symp Biocomput.* 2016;21:557-  
1227 67. doi: 10.1142/9789814749411\_0051.
- 1228 58. Tan J, Hammond JH, Hogan DA, Greene CS. ADAGE-based integration of  
1229 publicly available *Pseudomonas aeruginosa* gene expression data with denoising  
1230 autoencoders illuminates microbe-host interactions. *mSystems.* 2016;1(1):e00025-15.  
1231 doi: 10.1128/mSystems.00025-15.
- 1232 59. Taroni JN, Greene CS, Martyanov V, Wood TA, Christmann RB, Farber HW, et  
1233 al. A novel multi-network approach reveals tissue-specific cellular modulators of fibrosis  
1234 in systemic sclerosis. *Genome Med.* 2017;9(1):27. doi: 10.1186/s13073-017-0417-1.
- 1235 60. Way GP, Greene CS. Extracting a biologically relevant latent space from cancer  
1236 transcriptomes with variational autoencoders. *Pac Symp Biocomput.* 2018;23:80-91.  
1237 doi: doi:10.1142/9789813235533\_0008  
1238 10.1142/9789813235533\_0008.
- 1239 61. Zhu Q, Wong AK, Krishnan A, Aure MR, Tadych A, Zhang R, et al. Targeted  
1240 exploration and analysis of large cross-platform human transcriptomic compendia. *Nat*  
1241 *Methods.* 2015;12(3):211-4. doi: 10.1038/nmeth.3249.
- 1242 62. Taroni JN, Grayson PC, Hu Q, Eddy S, Kretzler M, Merkel PA, et al. MultiPLIER:  
1243 A transfer learning framework for transcriptomics reveals systemic features of rare  
1244 disease. *Cell Systems.* 2019;8(5):380-94.e4. Epub 2019/05/24. doi:  
1245 10.1016/j.cels.2019.04.003. PubMed PMID: 31121115; PubMed Central PMCID:  
1246 PMC6538307.
- 1247 63. Chen KM, Tan J, Way GP, Doing G, Hogan DA, Greene CS. PathCORE-T:  
1248 identifying and visualizing globally co-occurring pathways in large transcriptomic  
1249 compendia. *BioData Mining.* 2018;11(1):14-. doi: 10.1186/s13040-018-0175-7.
- 1250 64. Tan J, Huyck M, Hu D, Zelaya RA, Hogan DA, Greene CS. ADAGE signature  
1251 analysis: differential expression analysis with data-defined gene sets. *BMC*  
1252 *Bioinformatics.* 2017;18(1):512-. doi: 10.1186/s12859-017-1905-4.
- 1253 65. Recinos DA, Sekedat MD, Hernandez A, Cohen TS, Sakhtah H, Prince AS, et al.  
1254 Redundant phenazine operons in *Pseudomonas aeruginosa* exhibit environment-  
1255 dependent expression and differential roles in pathogenicity. *Proceedings of the*  
1256 *National Academy of Sciences.* 2012;109(47):19420-5. doi: 10.1073/pnas.1213901109.
- 1257 66. Mavrodi DV, Bonsall RF, Delaney SM, Soule MJ, Phillips G, Thomashow LS.  
1258 Functional analysis of genes for biosynthesis of pyocyanin and phenazine-1-  
1259 carboxamide from *Pseudomonas aeruginosa* PAO1. *J Bacteriol.* 2001;183(21):6454-65.  
1260 doi: 10.1128/jb.183.21.6454-6465.2001.

- 1261 67. Kanehisa M, Goto S. KEGG: kyoto encyclopedia of genes and genomes. *Nucleic*  
1262 *Acids Res.* 2000;28(1):27-30. Epub 1999/12/11. doi: 10.1093/nar/28.1.27. PubMed  
1263 PMID: 10592173; PubMed Central PMCID: PMC102409.
- 1264 68. Kanehisa M, Sato Y, Furumichi M, Morishima K, Tanabe M. New approach for  
1265 understanding genome variations in KEGG. *Nucleic Acids Res.* 2019;47(D1):D590-d5.  
1266 Epub 2018/10/16. doi: 10.1093/nar/gky962. PubMed PMID: 30321428; PubMed Central  
1267 PMCID: PMC6324070.
- 1268 69. Kanehisa M. Toward understanding the origin and evolution of cellular  
1269 organisms. *Protein Sci.* 2019;28(11):1947-51. Epub 2019/08/24. doi: 10.1002/pro.3715.  
1270 PubMed PMID: 31441146; PubMed Central PMCID: PMC6798127.
- 1271 70. Grahl N, Demers EG, Lindsay AK, Harty CE, Willger SD, Piispanen AE, et al.  
1272 Mitochondrial activity and *Cyr1* are key regulators of Ras1 Activation of *C. albicans*  
1273 virulence pathways. *PLoS Path.* 2015;11(8):e1005133. doi:  
1274 10.1371/journal.ppat.1005133.
- 1275 71. Kwak MK, Ku M, Kang SO. Inducible NAD(H)-linked methylglyoxal  
1276 oxidoreductase regulates cellular methylglyoxal and pyruvate through enhanced  
1277 activities of alcohol dehydrogenase and methylglyoxal-oxidizing enzymes in glutathione-  
1278 depleted *Candida albicans*. *Biochimica et Biophysica Acta (BBA) - General Subjects.*  
1279 2018;1862(1):18-39. Epub 2017/10/12. doi: 10.1016/j.bbagen.2017.10.003. PubMed  
1280 PMID: 29017767.
- 1281 72. Kwak MK, Ku M, Kang SO. NAD(+)-linked alcohol dehydrogenase 1 regulates  
1282 methylglyoxal concentration in *Candida albicans*. *FEBS Lett.* 2014;588(7):1144-53.  
1283 Epub 2014/03/13. doi: 10.1016/j.febslet.2014.02.042. PubMed PMID: 24607541.
- 1284 73. Rampioni G, Falcone M, Heeb S, Frangipani E, Fletcher MP, Dubern JF, et al.  
1285 Unravelling the genome-wide contributions of specific 2-Alkyl-4-quinolones and PqsE to  
1286 quorum sensing in *Pseudomonas aeruginosa*. *PLoS Pathog.* 2016;12(11):e1006029.  
1287 Epub 2016/11/17. doi: 10.1371/journal.ppat.1006029. PubMed PMID: 27851827;  
1288 PubMed Central PMCID: PMC5112799.
- 1289 74. Lee J, Wu J, Deng Y, Wang J, Wang C, Wang J, et al. A cell-cell communication  
1290 signal integrates quorum sensing and stress response. *Nat Chem Biol.* 2013;9(5):339-  
1291 43. Epub 2013/04/02. doi: 10.1038/nchembio.1225. PubMed PMID: 23542643.
- 1292 75. Meng X, Ahator SD, Zhang L-H. Molecular mechanisms of phosphate stress  
1293 activation of *Pseudomonas aeruginosa* quorum sensing systems. *mSphere.*  
1294 2020;5(2):e00119-20. doi: 10.1128/mSphere.00119-20.
- 1295 76. Schuster M, Lostroh CP, Ogi T, Greenberg EP. Identification, timing, and signal  
1296 specificity of *Pseudomonas aeruginosa* quorum-controlled genes: a transcriptome  
1297 analysis. *J Bacteriol.* 2003;185(7):2066-79. doi: 10.1128/jb.185.7.2066-2079.2003.
- 1298 77. Déziel E, Gopalan S, Tampakaki AP, Lépine F, Padfield KE, Saucier M, et al.  
1299 The contribution of MvfR to *Pseudomonas aeruginosa* pathogenesis and quorum  
1300 sensing circuitry regulation: multiple quorum sensing-regulated genes are modulated  
1301 without affecting *lasRI*, *rhIRI* or the production of N-acyl- L-homoserine lactones. *Mol*  
1302 *Microbiol.* 2005;55(4):998-1014. doi: 10.1111/j.1365-2958.2004.04448.x.

- 1303 78. Llamas MA, van der Sar A, Chu BCH, Sparrius M, Vogel HJ, Bitter W. A novel  
1304 extracytoplasmic function (ECF) sigma factor regulates virulence in *Pseudomonas*  
1305 *aeruginosa*. PLoS Path. 2009;5(9):e1000572. doi: 10.1371/journal.ppat.1000572.
- 1306 79. Monds RD, Newell PD, Schwartzman JA, O'Toole GA. Conservation of the Pho  
1307 regulon in *Pseudomonas fluorescens* Pf0-1. Appl Environ Microbiol. 2006;72(3):1910-  
1308 24. doi: 10.1128/aem.72.3.1910-1924.2006.
- 1309 80. Monds RD, Silby MW, Mahanty HK. Expression of the Pho regulon negatively  
1310 regulates biofilm formation by *Pseudomonas aureofaciens* PA147-2. Mol Microbiol.  
1311 2001;42(2):415-26. doi: 10.1046/j.1365-2958.2001.02641.x.
- 1312 81. Horwitz JP, Chua J, Noel M, Donatti JT, Freisler J. Substrates for cytochemical  
1313 demonstration of enzyme activity. II. Some dihalo-3-indolyl phosphates and sulfates.  
1314 Journal of Medical Chemistry. 1966;9(3):447. Epub 1966/05/01. doi:  
1315 10.1021/jm00321a059. PubMed PMID: 5960940.
- 1316 82. Chamnongpol S, Groisman EA. Acetyl phosphate-dependent activation of a  
1317 mutant PhoP response regulator that functions independently of its cognate sensor  
1318 kinase. J Mol Biol. 2000;300(2):291-305. doi: <https://doi.org/10.1006/jmbi.2000.3848>.
- 1319 83. Deretic V, Leveau JHJ, Mohr CD, Hibler NS. In vitro phosphorylation of AlgR, a  
1320 regulator of mucoidy in *Pseudomonas aeruginosa*, by a histidine protein kinase and  
1321 effects of small phospho-donor molecules. Mol Microbiol. 1992;6(19):2761-7. doi:  
1322 10.1111/j.1365-2958.1992.tb01455.x.
- 1323 84. Hiratsu K, Nakata A, Shinagawa H, Makino K. Autophosphorylation and  
1324 activation of transcriptional activator PhoB of *Escherichia coli* by acetyl phosphate in  
1325 vitro. Gene. 1995;161(1):7-10. doi: [https://doi.org/10.1016/0378-1119\(95\)00259-9](https://doi.org/10.1016/0378-1119(95)00259-9).
- 1326 85. Kim S-K, Wilmes-Riesenberg MR, Wanner BL. Involvement of the sensor kinase  
1327 EnvZ in the in vivo activation of the response-regulator PhoB by acetyl phosphate. Mol  
1328 Microbiol. 1996;22(1):135-47. doi: 10.1111/j.1365-2958.1996.tb02663.x.
- 1329 86. Ikeh MAC, Kastora SL, Day AM, Herrero-de-Dios CM, Tarrant E, Waldron KJ, et  
1330 al. Pho4 mediates phosphate acquisition in *Candida albicans* and is vital for stress  
1331 resistance and metal homeostasis. Mol Biol Cell. 2016;27(17):2784-801. doi:  
1332 10.1091/mbc.E16-05-0266. PubMed PMID: 27385340.
- 1333 87. Liu N-N, Flanagan PR, Zeng J, Jani NM, Cardenas ME, Moran GP, et al.  
1334 Phosphate is the third nutrient monitored by TOR in *Candida albicans* and provides a  
1335 target for fungal-specific indirect TOR inhibition. Proceedings of the National Academy  
1336 of Sciences. 2017;114(24):6346-51. doi: 10.1073/pnas.1617799114.
- 1337 88. Lev S, Djordjevic JT. Why is a functional PHO pathway required by fungal  
1338 pathogens to disseminate within a phosphate-rich host: A paradox explained by alkaline  
1339 pH-simulated nutrient deprivation and expanded PHO pathway function. PLoS Path.  
1340 2018;14(6):e1007021-e. doi: 10.1371/journal.ppat.1007021. PubMed PMID: 29928051.
- 1341 89. Liu N-N, Uppuluri P, Broggi A, Besold A, Ryman K, Kambara H, et al.  
1342 Intersection of phosphate transport, oxidative stress and TOR signalling in *Candida*  
1343 *albicans* virulence. PLoS Path. 2018;14(7):e1007076. doi:  
1344 10.1371/journal.ppat.1007076.

- 1345 90. Urrialde V, Prieto D, Pla J, Alonso-Monge R. The *Candida albicans* Pho4  
1346 transcription factor mediates susceptibility to stress and influences fitness in a mouse  
1347 commensalism model. *Front Microbiol.* 2016;7(1062). doi: 10.3389/fmicb.2016.01062.
- 1348 91. Crocker AW, Harty CE, Hammond JH, Willger SD, Salazar P, Botelho NJ, et al.  
1349 *Pseudomonas aeruginosa* ethanol oxidation by AdhA in low oxygen environments. *J*  
1350 *Bacteriol.* 2019;JB.00393-19. doi: 10.1128/jb.00393-19.
- 1351 92. Mern DS, Ha S-W, Khodaverdi V, Gliese N, Görisch H. A complex regulatory  
1352 network controls aerobic ethanol oxidation in *Pseudomonas aeruginosa*: indication of  
1353 four levels of sensor kinases and response regulators. *Microbiology.* 2010;156(5):1505-  
1354 16. doi: doi:10.1099/mic.0.032847-0.
- 1355 93. Hornby JM, Jensen EC, Lisec AD, Tasto JJ, Jahnke B, Shoemaker R, et al.  
1356 Quorum sensing in the dimorphic fungus *Candida albicans* is mediated by farnesol.  
1357 *Appl Environ Microbiol.* 2001;67(7):2982-92. PubMed PMID: 11425711.
- 1358 94. Qi Y, Kobayashi Y, Hulett FM. The *pst* operon of *Bacillus subtilis* has a  
1359 phosphate-regulated promoter and is involved in phosphate transport but not in  
1360 regulation of the pho regulon. *J Bacteriol.* 1997;179(8):2534-9. doi:  
1361 10.1128/jb.179.8.2534-2539.1997.
- 1362 95. Nikata T, Sakai Y, Shibata K, Kato J, Kuroda A, Ohtake H. Molecular analysis of  
1363 the phosphate-specific transport (*pst*) operon of *Pseudomonas aeruginosa*. *MGG*  
1364 *Molecular & General Genetics.* 1996;250(6):692-8. doi: 10.1007/BF02172980.
- 1365 96. Madhusudhan KT, McLaughlin R, Komori N, Matsumoto H. Identification of a  
1366 major protein upon phosphate starvation of *Pseudomonas aeruginosa* PAO1. *J Basic*  
1367 *Microbiol.* 2003;43(1):36-46. doi: 10.1002/jobm.200390002.
- 1368 97. Kim H-Y, Schlichtman D, Shankar S, Xie Z, Chakrabarty AM, Kornberg A.  
1369 Alginate, inorganic polyphosphate, GTP and ppGpp synthesis co-regulated in  
1370 *Pseudomonas aeruginosa*: implications for stationary phase survival and synthesis of  
1371 RNA/DNA precursors. *Mol Microbiol.* 1998;27(4):717-25. doi: 10.1046/j.1365-  
1372 2958.1998.00702.x.
- 1373 98. Gallarato LA, Sanchez DG, Olvera L, Primo ED, Garrido MN, Beassoni PR, et al.  
1374 Exopolyphosphatase of *Pseudomonas aeruginosa* is essential for the production of  
1375 virulence factors, and its expression is controlled by NtrC and PhoB acting at two  
1376 interspaced promoters. *Microbiology.* 2014;160(Pt\_2):406-17. doi:  
1377 10.1099/mic.0.074773-0.
- 1378 99. Almeida LGd, Ortiz JH, Schneider RP, Spira B. *phoU* Inactivation in  
1379 *Pseudomonas aeruginosa* enhances accumulation of ppGpp and polyphosphate. *Appl*  
1380 *Environ Microbiol.* 2015;81(9):3006-15. doi: 10.1128/AEM.04168-14.
- 1381 100. Bertani G. Studies on lysogenesis. I. The mode of phage liberation by lysogenic  
1382 *Escherichia coli*. *J Bacteriol.* 1951;62(3):293-300. Epub 1951/09/01. PubMed PMID:  
1383 14888646; PubMed Central PMCID: PMC386127.
- 1384 101. Shanks RM, Caiazza NC, Hinsa SM, Toutain CM, O'Toole GA. *Saccharomyces*  
1385 *cerevisiae*-based molecular tool kit for manipulation of genes from gram-negative  
1386 bacteria. *Appl Environ Microbiol.* 2006;72(7):5027-36. PubMed PMID: 16820502.

- 1387 102. Gibson DG, Glass JI, Lartigue C, Noskov VN, Chuang R-Y, Algire MA, et al.  
1388 Creation of a bacterial cell controlled by a chemically synthesized genome. *Science*.  
1389 2010;329(5987):52-6. doi: 10.1126/science.1190719.
- 1390 103. Gibson DG, Young L, Chuang R-Y, Venter JC, Hutchison CA, Smith HO.  
1391 Enzymatic assembly of DNA molecules up to several hundred kilobases. *Nat Methods*.  
1392 2009;6(5):343-5. doi: 10.1038/nmeth.1318.
- 1393 104. Team RDC. R: A language and environemnt for statistical computing. Vienna,  
1394 Austria: R Foundation for Statistical Computing; 2010.
- 1395 105. Wickham H. ggplot2: Elegend Graphics for Data Analysis. New York: Springer-  
1396 Verlag; 2016.
- 1397 106. Robinson M, McCarthy D, Smyth G. edgeR: a Bioconductor package for  
1398 differential expression analysis  
1399 of digital gene expression data. *Bioinformatics*. 2010;26(1):139-40.
- 1400 107. Tenenbaum D. KEGGREST: Client-side REST access to KEGG. 2018.
- 1401 108. Zuguang G, Eils R, Schlesner M. Complex heatmaps reveal patterns and  
1402 correlations in multidimensional genomic data. *Bioinformatics*. 2016.
- 1403 109. Miller JH. *A Short Course in Bacterial Genetics*: Cold Spring Harbor Press; 1992.  
1404 456 p.
- 1405 110. Sacks LE. A pH gradient agar plate. *Nature*. 1956;178(4527):269-70. doi:  
1406 10.1038/178269a0.

1407

## 1408 **Supporting Information**

1409

1410 **S1 Table. Clustering coefficients for co-culture data.**

1411 **S2 Table. eADAGE gene-gene network cliques of DEGs from co-culture.**

1412 **S3 Table. Strains and plasmids used in this study.**

1413 **S4. Table. Primers used in this study.**

1414 **S1 Dataset. *P.a.* DEGs in co-culture with *C.a.*.**

1415 **S2 Dataset. *C.a.* DEGS in co-culture with *P.a.*.**

1416 **S3 Dataset. KEGG pathway analyses.**

1417 **S4 Dataset. Gene sets used throughout the paper.**

1418 **Figures**

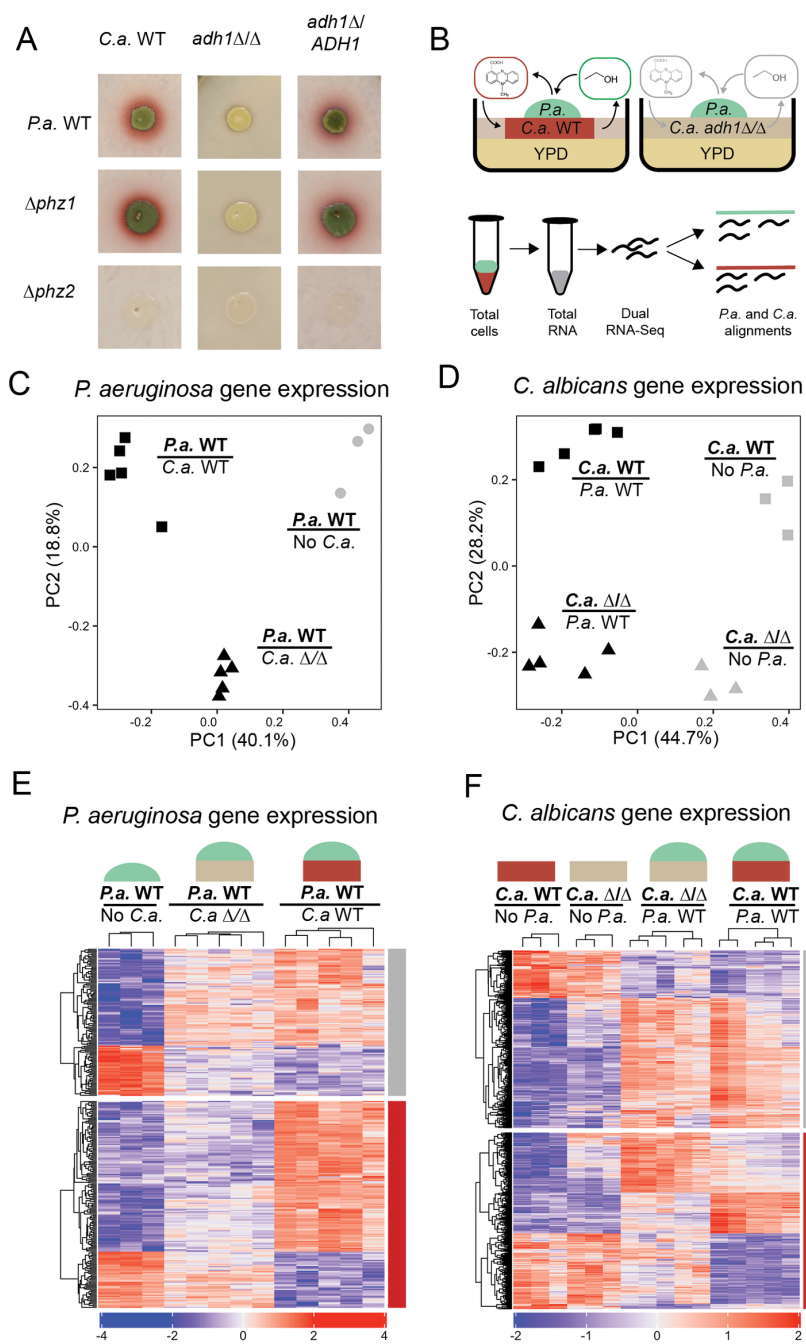

1419

1420

1421 **Figure 1. In co-culture of *C. albicans* (*C.a.*) and *P. aeruginosa* (*P.a.*), *C.a.*-**  
1422 **produced ethanol stimulates *P.a.* to produce 5-MPCA and transcriptional**  
1423 **responses ensue from both organisms.** A) Co-cultures of *P.a.* wild type (WT) and  
1424 mutants lacking phenazine biosynthesis operons ( $\Delta phz1$  or  $\Delta phz2$ ) were inoculated onto  
1425 72 h-old lawns of *C.a.* wild type (WT), *C.a. adh1* $\Delta/\Delta$  and *adh1* $\Delta/\Delta$  reconstituted with  
1426 *ADH1* (*adh1* $\Delta/ADH1$ ). The red pigmentation indicates production of the phenazine 5-  
1427 MPCA by *P.a.*. B) Dual RNA-Seq allowed for parallel analyses of *P.a.* (green) and *C.a.*  
1428 (red or pink) mRNA expression profiles from co-culture lawns to survey the effects of  
1429 ethanol (green oval) and 5-MPCA (red oval) on gene expression. C) Principle  
1430 component analysis (PCA) of TPM (transcripts per kilobase per million reads) from  
1431 transcriptome profiles of *P.a.* grown alone (No *C.a.*), *P.a.* grown with *C.a.* WT, and *P.a.*  
1432 grown with *C.a. adh1* $\Delta/\Delta$ . D) PCA of gene expression profiles of *C.a.* WT and *C.a.*  
1433 *adh1* $\Delta/\Delta$  grown in mono-culture (No *P.a.*) or co-cultures with *P.a.* WT. E) The  
1434 expression (z-score of TPM) of genes that differentiate *P.a.* in mono-culture from that  
1435 grown in co-culture with *C.a.* WT (absolute value of log<sub>2</sub>fold-change (logFC) > 1 and  
1436 false discovery rate (FDR) < 0.05); data for *P.a.* on *C.a. adh1* $\Delta/\Delta$  are also shown. The  
1437 red bar indicates genes that are significantly different between *C.a.* WT and *adh1* $\Delta/\Delta$   
1438 (logFC >1, FDR < 0.05); the grey bar indicates genes that are not. F) Gene expression  
1439 (z-score of TPM) of *C.a.* WT and *adh1* $\Delta/\Delta$  grown in mono-culture or in co-culture with  
1440 *P.a.*; genes that are significantly different between *C.a.* WT alone or *C.a.* WT with *P.a.*  
1441 (logFC >1, FDR < 0.05) are shown for all four sample types. Genes that are also  
1442 significantly different between *C.a.* WT and *adh1* $\Delta/\Delta$  in the presence of *P.a.* (logFC >1,  
1443 FDR < 0.05) are indicated by the red bar; the grey bar indicates genes that are not  
1444 significantly different in this comparison.  
1445  
1446  
1447  
1448

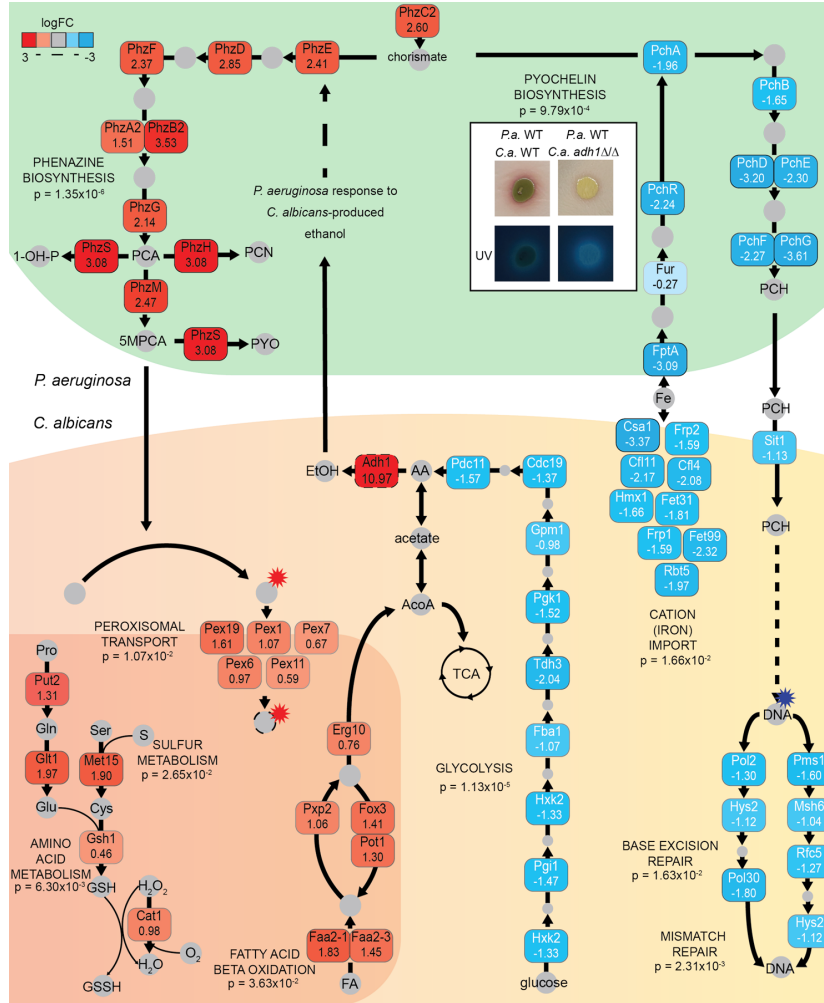

1449

1450



1451

1452

1453 **Figure 2. Pathways containing differentially expressed genes in *P. aeruginosa***  
1454 **and *C. albicans* between co-cultures of *P. aeruginosa* wild type (WT) with *C.***  
1455 ***albicans* WT or *adh1*ΔΔ.** DEGs of between *C. albicans* WT and *adh1*ΔΔ from *P.*  
1456 *aeruginosa* co-cultures contained over-representations of KEGG pathways for amino  
1457 acid metabolism, sulfur (S) metabolism, peroxisomal transport, fatty acid beta-oxidation,  
1458 glycolysis, cation (Fe) import, base excision and mismatch DNA repair. Red indicates  
1459 higher expression in co-cultures with *C. albicans* WT and blue indicates higher  
1460 expression in co-cultures with *C. albicans adh1*ΔΔ. Values indicate log<sub>2</sub>fold-change. *C.*  
1461 *albicans adh1*ΔΔ has higher expression of glycolysis genes and the production of  
1462 acetate, which is either secreted or enters into the citric acid cycle (TCA). *P. aeruginosa*  
1463 DEGs from the same co-cultures were contained over-representations of KEGG  
1464 pathways for phenazine (PCA, PCN, PYO, 1-OH-P, 5-MCPA) biosynthesis and  
1465 pyochelin (PCH) biosynthesis pathways. Inset shows increase in siderophore-derived  
1466 fluorescence of co-cultures of *P. aeruginosa* with *C. albicans adh1*ΔΔ which is  
1467 consistent with increased PCH production. P-values are from hypergeometric over-  
1468 representation tests, FDR corrected.  
1469  
1470

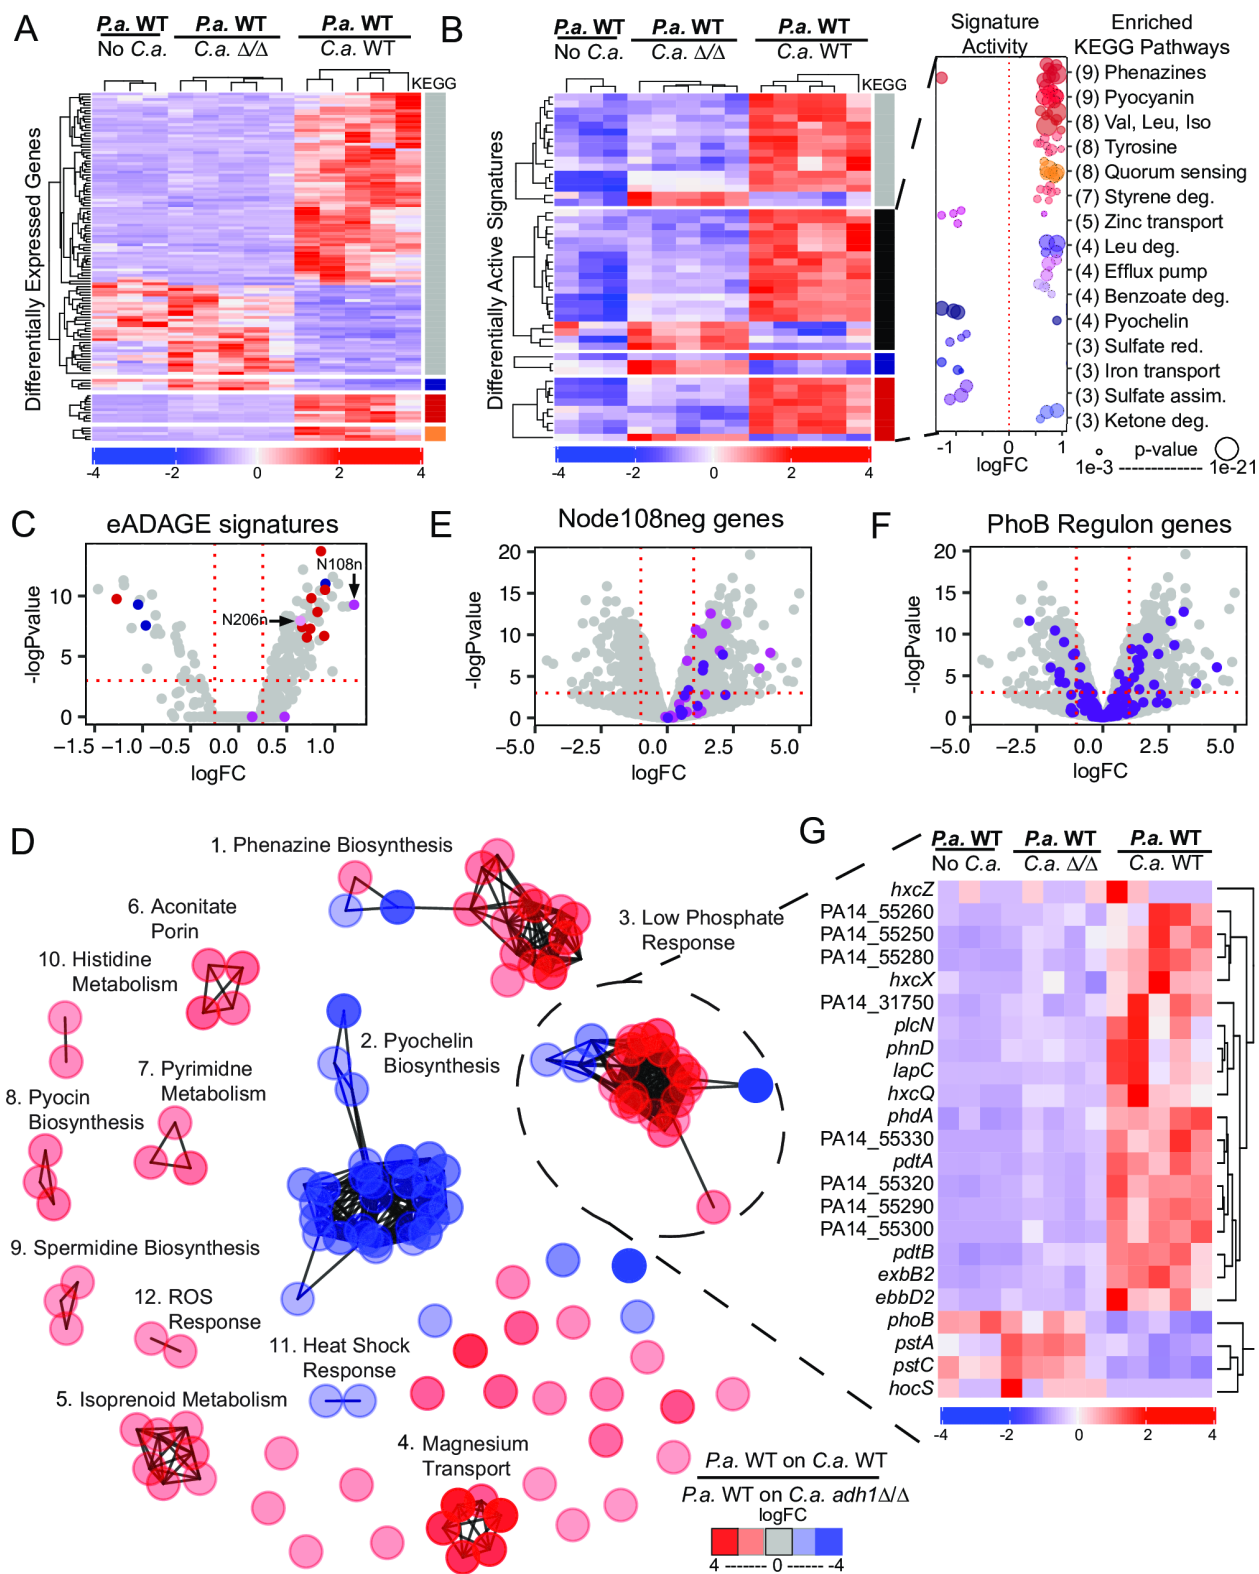

1471

1472

1473 **Figure 3. eADAGE analysis reveals a subset of the Pho regulon upregulated in *P.***  
1474 ***aeruginosa* (*P.a.*) grown on *C. albicans* (*C.a.*) WT compared to that on *C.a.***  
1475 ***adh1*Δ/Δ.** A) Differentially expressed genes (DEGs) between *P.a.* grown alone or on  
1476 *C.a.* WT and *C.a. adh1*Δ/Δ for 24 h. Genes that fell within over-represented KEGG  
1477 pathways (quorum sensing (orange bar), phenazine biosynthesis (red bar) and  
1478 pyochelin biosynthesis (blue bar)) are indicated. Most DEGs do not belong to any of the  
1479 three pathways (grey bar). B) Differentially active eADAGE signatures (DASs) for the  
1480 same samples shown in A. Signatures in which genes annotated as being involved in  
1481 phenazine biosynthesis (red bar), pyochelin biosynthesis (blue bar), or other KEGG  
1482 pathways (black bar) are overrepresented are indicated. Signatures that are not over-  
1483 represented an any KEGG pathways are indicated by the grey bar. Inset shows the fold-  
1484 change for the expression all of the KEGG pathways that are over-represented among  
1485 the DASs (# of DASs per KEGG pathway in parentheses); over-representation p-value  
1486 shown as circle (Supp. Dataset 3). C) DASs with increased activity in transcriptome  
1487 comparisons of *P.a.* grown on *C.a.* WT compared to on *C.a. adh1*Δ/Δ. In addition to  
1488 DASs with over-representations of pyochelin (blue dots) and phenazine (red dots)  
1489 biosynthesis, others over-represent the Pho regulon (Node108n, purple) or contain  
1490 ethanol catabolism genes (N206n, pink). D) The eADAGE signature with the highest  
1491 increase in activity, Node108neg (N108n, purple), contains many genes with increased  
1492 expression though not all met the criterion of DEGs individually (logFC > 1, FDR <  
1493 0.05). E) DEGs in *P.a.* grown on *C.a.* WT compared to on *C.a. adh1*Δ/Δ with expression  
1494 levels of PhoB-regulated genes (dark purple) highlighted. F) Network analysis of DEGs  
1495 suggest groups of DEGs have correlated patterns across eADAGE: phenazine  
1496 biosynthesis (1) is inversely expressed with the low iron response (2) and coordinately  
1497 upregulated with the low phosphate response (3) upon exposure to ethanol in co-  
1498 culture. Other cliques of DEGs participate in shared biological pathways. See table 2 for  
1499 descriptions of all cliques. G) The Pho Clique (3) contains two clades of DEGs with  
1500 opposing expression patterns between *P.a.* grown on *C.a.* WT and *C.a. adh1*Δ/Δ.  
1501  
1502  
  
1503

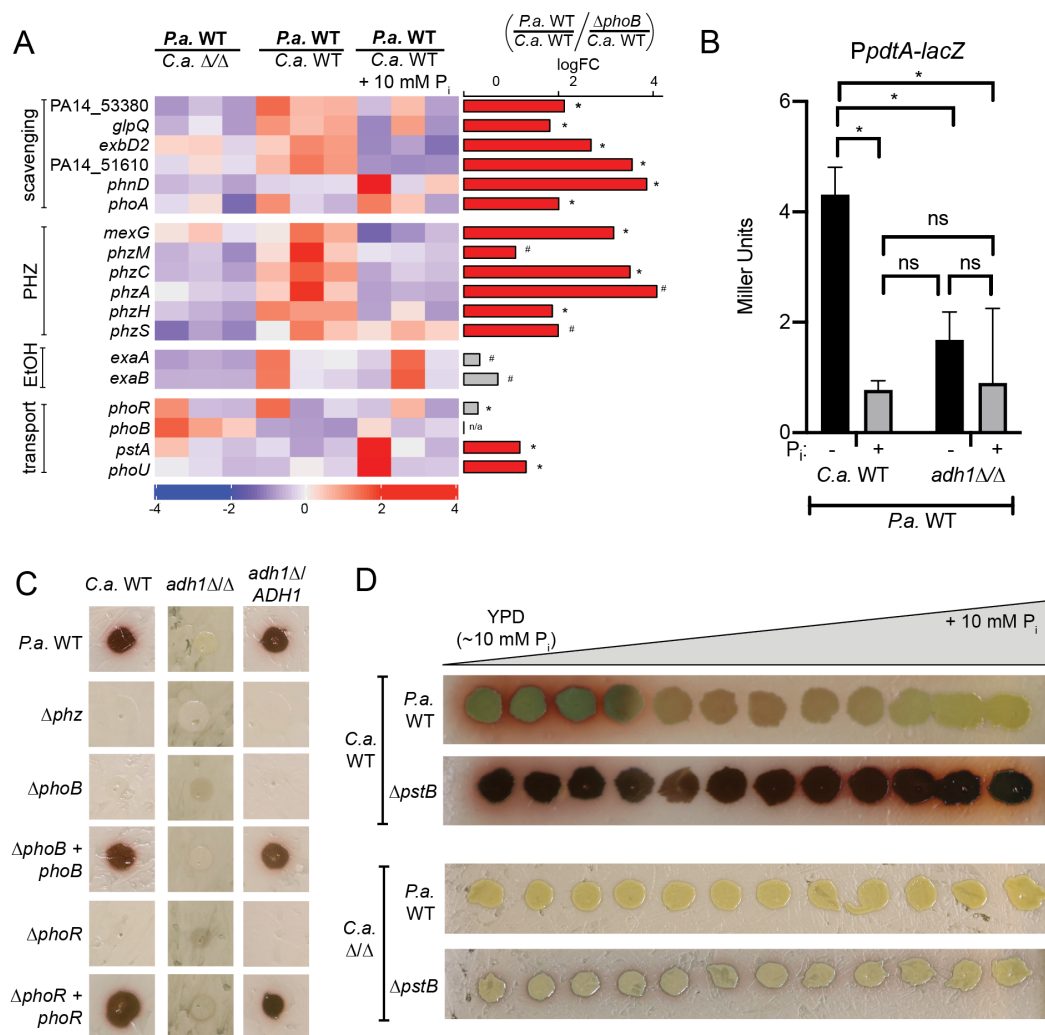

1504

1505

1506

1507 **Figure 4. *C. albicans* (*C.a.*) WT induced PhoB-regulated genes in *P. aeruginosa***  
1508 **(*P.a.*) compared to *C.a. adh1Δ/Δ* leading to 5-MPCA production as indicated by red**  
1509 **pigment formation. A) Expression of *P.a.* genes involved in phosphate scavenging,**  
1510 **phenazine biosynthesis (PHZ), ethanol catabolism (EtOH) and inorganic phosphate**  
1511 **transport were measured by NanoString (codesetPAV5) from cells grown with *C.a.***  
1512 ***adh1Δ/Δ*, *C.a.* WT or *C.a.* WT grown on medium with additional 10 mM phosphate.**  
1513 **Expression values are normalized to loading controls and housekeeping genes as**  
1514 **described in methods. Values are z-scored, scaled by gene. Right-hand barplot shows**  
1515 **logFC between *P.a.* WT and *P.a. ΔphoB* on *C.a.* WT. The bar is colored red if**  
1516 **expression is PhoB-dependent ( $\log_{2}FC \text{ } P.a. \text{ WT} / P.a. \text{ } \Delta phoB > 1$ , FDR < 0.05, else**  
1517 **grey). \* = FDR < 0.05, # = FDR > 0.05. B) Beta-galactosidase activity indicative of**  
1518 **expression of a *pdtA-lacZ* promoter fusion in *P.a.* WT in *P.a.* grown with *C.a.***  
1519 ***adh1Δ/Δ* in the absence or presence of  $P_i$  supplementation, \*,  $p < 0.05$  by ANOVA ( $n = 3$ ).**  
1520 **C) Red 5-MPCA derivatives produced in co-culture by *P.a.* WT,  $\Delta phoB$ ,  $\Delta phoR$ , and their**  
1521 **complemented derivatives on *C.a.* WT, *adh1Δ/Δ*, and *adh1Δ/ADH1*. D) Red 5-MPCA-**  
1522 **derivatives produced by *P.a.* WT and *P.a. ΔpstB* over a gradient of phosphate**  
1523 **concentrations. *P.a. ΔpstB* has constitutive PhoB activity. Conversely, *P.a.* WT did not**  
1524 **produce 5-MPCA on *Ca. adh1Δ/Δ* at any phosphate concentration, but *P.a. ΔpstB***  
1525 **induced a small amount of red pigment independent of the phosphate concentration.**

1526

1527

1528

1529

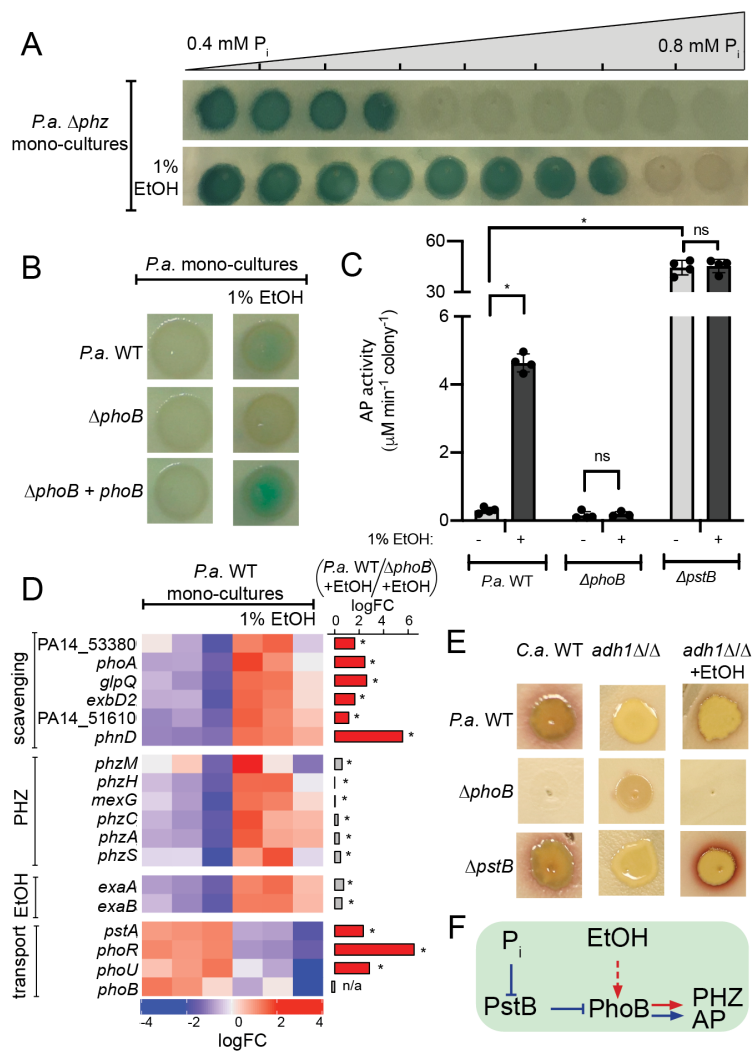

1530

1531

1532

1533 **Figure 5. Ethanol (EtOH) induced PhoB activity in *P. aeruginosa* (*P.a.*) mono-**  
1534 **culture.** A) Alkaline phosphatase (AP) activity visualized by blue color derived from  
1535 cleavage of BCIP in MOPS medium with a gradient of phosphate in the absence and  
1536 presence of ethanol. The *P.a. Δphz* strain was used to eliminate color differences due to  
1537 phenazine production. B) AP activity in the absence and presence of ethanol was  
1538 visualized with BCIP added to MOPS agar (0.7 mM phosphate) for *P.a.* wild type,  
1539 *ΔphoB* and the *ΔphoB* mutant complemented with a wild-type copy of *phoB* integrated  
1540 at the native locus. C) AP activity in cells from colony biofilms grown as in B was  
1541 measured using the colorimetric substrate pNPP for *P.a.* WT, *ΔphoB*, and *ΔpstB*, a  
1542 strain with constitutive PhoB activity. \*, $p < 0.01$  by ANOVA ( $n \geq 3$ ). D) Transcripts within  
1543 the PhoB regulon involved in phosphate scavenging and inorganic phosphate transport  
1544 and genes involved in phenazine production (PHZ) and ethanol catabolism (EtOH) were  
1545 measured in cells grown in the absence and presence of ethanol by Nanostring  
1546 (codeset PAV5). PhoB-regulated genes increased in expression (top section) and  
1547 ethanol catabolism genes (third section) increase in expression and others decrease  
1548 (bottom section). Expression values are normalized to loading controls and  
1549 housekeeping genes as described in methods. Values are scaled by gene. Right-hand  
1550 barplot shows logFC between *P.a.* WT and *P.a. ΔphoB* on MOPS+1%EtOH. The bar is  
1551 colored red if expression is PhoB-dependent ( $\log_{2}FC \text{ } P.a. \text{ WT} / P.a. \text{ } \Delta phoB > 1$ , FDR <  
1552 0.05, else grey). \*, FDR < 0.05, #, FDR > 0.05. E) PhoB activity and ethanol are both for  
1553 5-MPCA production in response to *C.a.* ethanol. *P.a.* WT, *ΔphoB* and *ΔpstB* were grown  
1554 on *C.a.* WT, or *C.a. adh1Δ/Δ* in the absence or presence of exogenous ethanol. 5-  
1555 MPCA production was rescued by the addition of 1% ethanol to a co-culture of *P.a.*  
1556 *ΔpstB* and, to a lesser extent, *P.a.* WT on *C.a. adh1Δ/Δ*. F) Phosphate ( $P_i$ ) and ethanol  
1557 (EtOH) are additive stimuli that promote PhoB-dependent expression of AP and  
1558 phenazine biosynthesis (PHZ).

1559  
1560

1561

1562

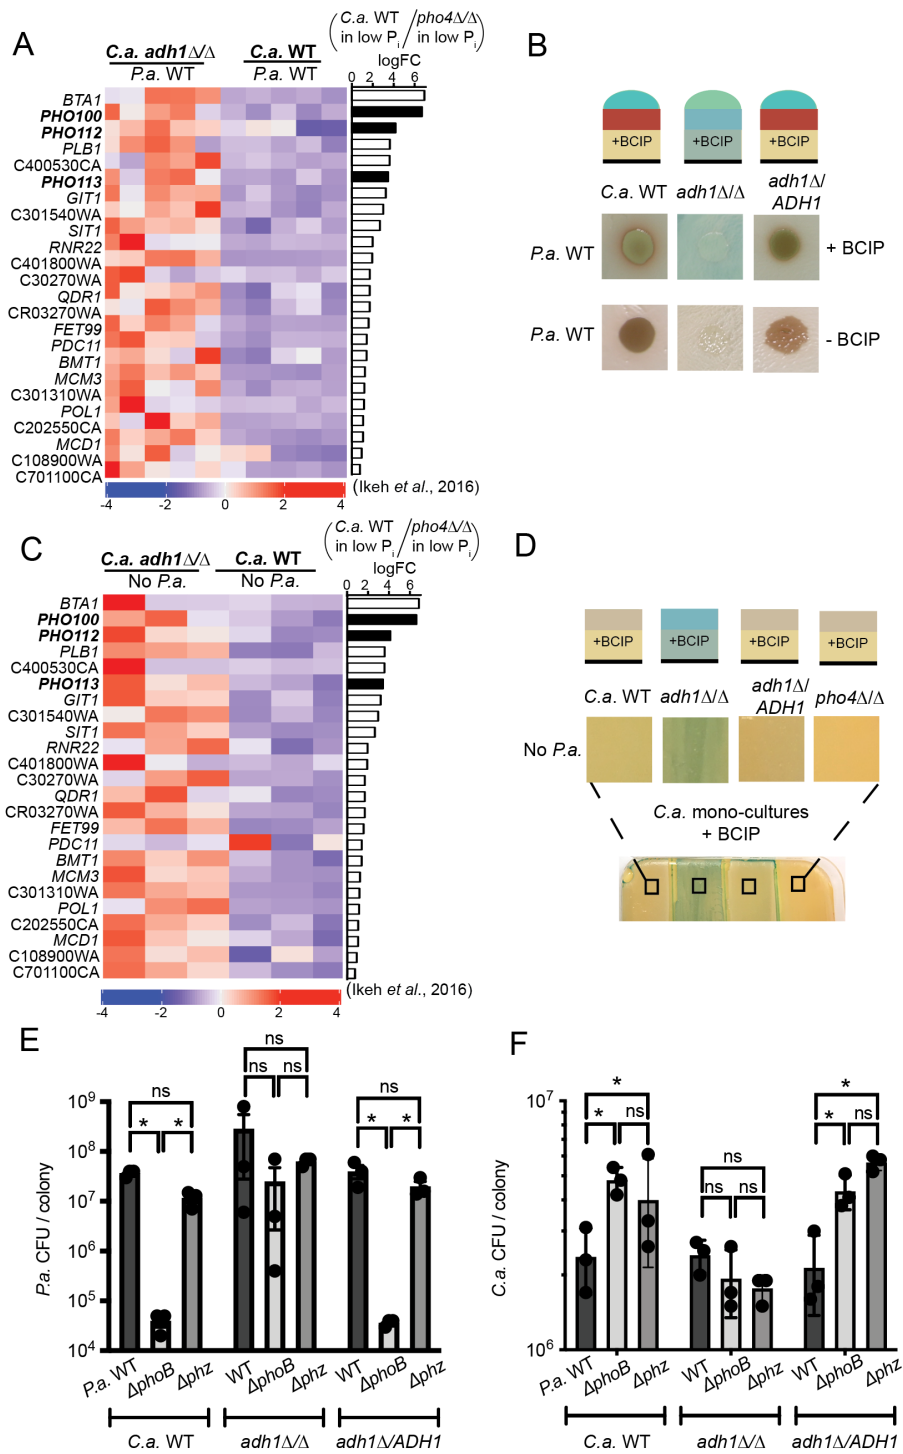

1563

1564



1565 **Figure 6. The *C. albicans* (*C.a.*) *adh1*Δ/Δ has increased expression of the Pho4-**  
1566 **mediated low phosphate response in co-culture that is inversely correlates with**  
1567 **PhoB activity in *P. aeruginosa* (*P.a.*).** A) Previously characterized Pho4-regulated  
1568 genes [86] including a phospholipase and phosphatases (black bars) were more highly  
1569 expressed in *C.a. adh1*Δ/Δ than *C.a.* WT in *P.a.* co-cultures (data shown as z-scores of  
1570 TPM). Pho4-dependence is shown in the right-hand barplot as log<sub>2</sub>FC *C.a.* WT/*C.a.*  
1571 *pho4*Δ/Δ using data from [86]. B) Analysis of phosphatase activity in *C.a.* WT, *C.a.*  
1572 *adh1*Δ/Δ, the complemented strain *adh1*Δ/*ADH1* or *pho4*Δ/Δ using the colorimetric  
1573 phosphatase BCIP substrate in agar. More phosphatase activity was observed in *C.a.*  
1574 *adh1*Δ/Δ than in strains with *ADH1* in in co-culture with *P.a.* C) The same Pho4-  
1575 regulated genes as shown in A were also more highly expressed in *C.a. adh1*Δ/Δ than  
1576 *C.a.* WT in mono-cultures. Right-hand barplot shows Pho4-dependence as in A. D)  
1577 More phosphatase activity was observed in *C.a. adh1*Δ/Δ than in strains with *ADH1* in in  
1578 mono-culture. . As predicted, phosphatase activity is not evident in the *C.a. pho4*Δ/Δ  
1579 strain. Phosphatase activity visualized via BCIP as in B. E) Number of CFUs of *P.a.* WT,  
1580 Δ*phoB* or Δ*phz* after co-culture for 72 h with *C.a.* WT, *C.a. adh1*Δ/Δ *C.a. adh1*Δ/*ADH1*.  
1581 *P.a.* Δ*phoB* and Δ*phz* had significantly fewer CFUs on *C.a.* strains with high ethanol  
1582 production (WT and *adh1*Δ/*ADH1*), but not *C.a. adh1*Δ/Δ. F) In the same samples  
1583 analyzed in A, *C.a.* CFU formation was assessed. *C.a.* WT or *C.a. adh1*Δ/*ADH1* strains  
1584 had increased fitness in-culture with *P.a.* Δ*phoB* or *P.a.* Δ*phz* compared to with *P.a.* WT.  
1585 For *C.a. adh1*Δ/Δ, there were no differences in CFU formation when co-cultured with  
1586 *P.a.* WT, Δ*phoB* or Δ*phz*.  
1587  
1588

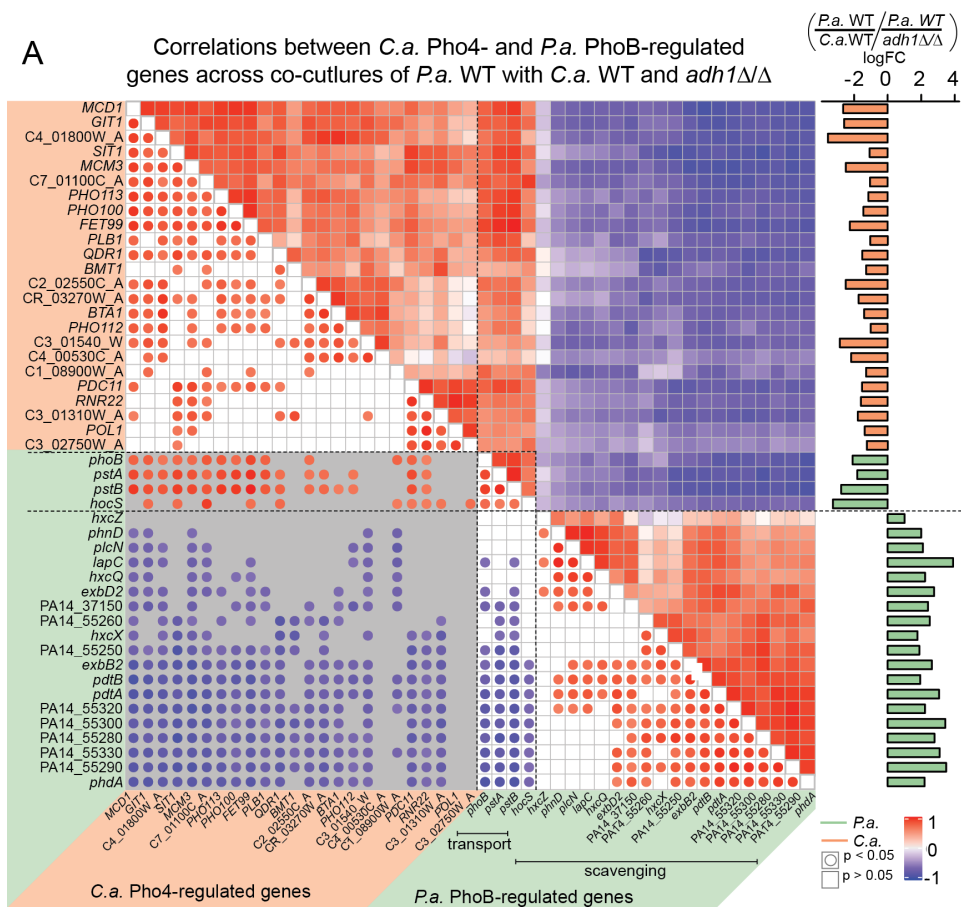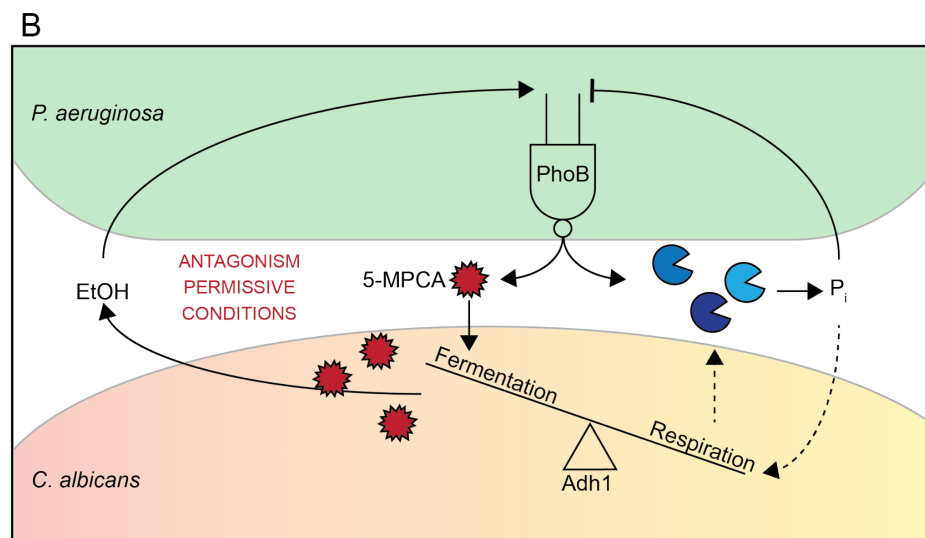

1589

1590

1591 **Figure 7. *P. aeruginosa* (*P.a.*) PhoB affects both *P.a.* and *C. albicans* (*C.a.*) fitness**  
1592 **in co-culture through its control of phenazine production and phosphate**  
1593 **acquisition.** A) Pearson correlation analysis between *P.a.* (green annotations) and *C.a.*  
1594 (orange annotations) low phosphate-responsive genes from co-cultures of *P.a.* WT with  
1595 either *C.a.* WT or *adh1* $\Delta/\Delta$ . Largely inverse relationships between *P.a.* PhoB- and *C.a.*  
1596 Pho4-regulated genes is apparent. Log<sub>2</sub>FC ( $p < 0.05$ ) between *P.a.* with either *C.a.* WT  
1597 or *C.a.* *adh1* $\Delta/\Delta$  is shown in the right-hand bar plot. Lower half of correlogram shows  
1598 which correlations are significant (filled circles) and indicates correlation values by color  
1599 intensity relative to scale. Same species comparisons have white backgrounds and  
1600 cross-species correlations have grey backgrounds. B) Model of PhoB activity in *P.a.*-  
1601 *C.a.* co-cultures. PhoB mediates the conditional production of the antagonistic,  
1602 antifungal phenazine 5-MPCA in response to phosphate and fungal ethanol  
1603 production. \*\*,  $p < 0.01$  by ANOVA.  
1604

1605

1606

1607 **Supplementary Figure**

1608

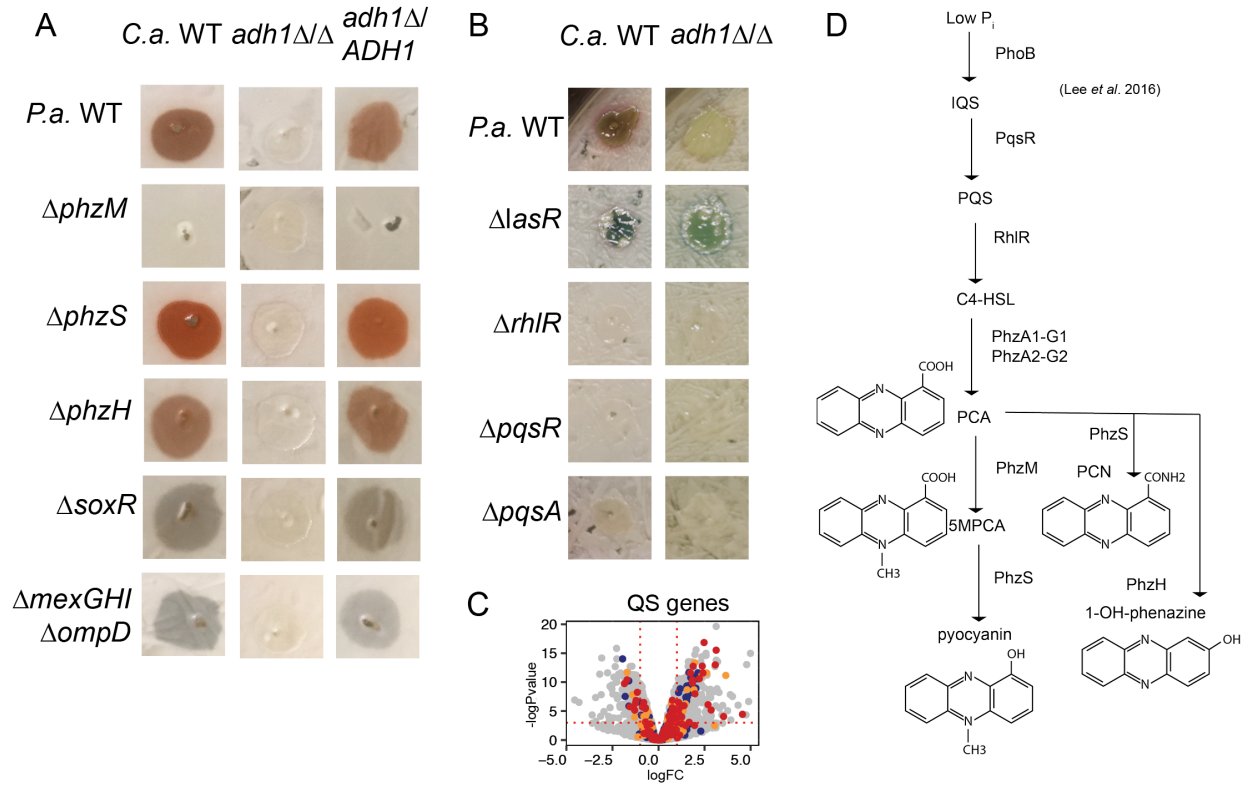

1609

1610

1611 **Figure S1. Red pigment formation is dependent on phenazine biosynthesis**  
 1612 **genes, phenazine transport genes and quorum sensing (QS) pathways in *P.***  
 1613 ***aeruginosa* (*P.a.*).** A) Co-cultures of *P.a.* wild type (WT) and mutants lacking genes  
 1614 involved in phenazine biosynthesis were inoculated onto lawns of *C.a.* (WT), *C.a.*  
 1615 *adh1Δ/Δ* and *adh1Δ/Δ* reconstituted with *ADH1* then incubated for 24 h. *P.a.* 5-MPCA  
 1616 phenazine biosynthesis (evident by red color) was not observed with the  $\Delta phzM$  but was  
 1617 still produced by  $\Delta phzS$  and  $\Delta phzH$ . 5-MPCA production was dependent on the  
 1618 oxidative stress response gene *soxR* and 5-MPCA transport complex *mexGHI-ompD*.  
 1619 For all *P.a.* strains, 5-MPCA was only produced on *C.a.* with intact *ADH1*. B) Co-  
 1620 cultures of *P.a.* wild type (WT) and mutants lacking genes involved in quorum sensing  
 1621 were inoculated onto lawns of *C.a.* (WT), *C.a. adh1Δ/Δ* and *adh1Δ/Δ* reconstituted with  
 1622 *ADH1* then incubated for 48 h. *P.a.* mutants defective in QS pathways ( $\Delta lasR$ ,  $\Delta rhIR$ ,  
 1623  $\Delta pqsR$ ,  $\Delta pqsA$ ) form less red pigment than *P.a.* WT on *C.a.* WT and no strains form red  
 1624 pigment on *C.a. adh1Δ/Δ*. C) Gene expression of *P.a.* LasR (blue), RhIR (orange) and  
 1625 PqsR (red) regulated genes had heterogeneous expression with genes both up and  
 1626 down regulated. D) Red pigment formation being dependent on QS pathways of RhIR  
 1627 and PqsR is consistent with integration of QS with PhoB via the integrative quorum  
 1628 sensing (IQS) pathway in which low phosphate triggers PhoB activity which influences  
 1629 PqsR and RhIR to act, via their cognate autoinducers PQS and C4-HSL respectively, in  
 1630 a regulatory cascade eventually promoting the transcription of phenazine biosynthesis  
 1631 genes (*phzA1-G1*, *phzA2-G2*) and consequent phenazine carboxylic acid (PCA)  
 1632 production. PhoB and QS have also been reported to effect the expression of  
 1633 phenazine modification genes *phzM*, *phzS*, and *phzH* necessary for the conversion of  
 1634 PCA to 5-methyl-phenazine-1-carboxylic acid (5-MPCA), pyocyanin, phenazine-1-  
 1635 carboxamide (PCN) and 1-hydroxy-phenazine (1-OH-phenazine) [74].  
 1636

1637

## 1638 Supplementary Tables

1639 **Table S1. Clustering coefficients for co-culture data.** Results of clustering  
 1640 coefficients (CC) for gene expression and eADAGE signature activity values for  
 1641 samples grouped by experimental condition. For each sample comparison, random  
 1642 controls with a comparable number of samples are shown. For all analyses, CC mean  
 1643 and standard deviation (SD) are shown .

| Groups                   | CC for gene expression |        | CC for signature activity |        |
|--------------------------|------------------------|--------|---------------------------|--------|
|                          | CC                     | SD     | CC                        | SD     |
| CAF2 vs <i>adh1Δ/Δ</i>   | 0.38                   |        | 0.68                      |        |
| Random (5v5)             | 0.14                   | ± 0.07 | 0.12                      | ± 0.12 |
| Coculture vs Monoculture | 0.42                   |        | 0.53                      |        |
| Random(10v3)             | 0.14                   | ± 0.16 | 0.15                      | ± 0.22 |
| CAF2 vs YPD              | 0.58                   |        | 0.80                      |        |
| Random (5v3)             | 0.13                   | ± 0.09 | 0.10                      | ± 0.11 |

1644  
1645  
1646  
1647  
1648  
1649  
1650  
1651  
1652  
1653

**Table S2: eADAGE gene-gene network cliques of DEGs from co-culture.** Cliques from the eADAGE gene-gene subnetwork of genes differentially expressed between *P.a.* grown on WT and *adh1Δ/Δ C.a.*. Cliques were considered as groups of genes (> 1 gene) connected by edges with weights > 0.5 of Pearson correlation in signature weights in eADAGE. Cliques were numbered arbitrarily and named to represent the known functional characterizations of genes contained in each clique.

| Clique Number | Description                         | Clique size | Genes                                                                                                                                                                                                                                                                                                                                                          |
|---------------|-------------------------------------|-------------|----------------------------------------------------------------------------------------------------------------------------------------------------------------------------------------------------------------------------------------------------------------------------------------------------------------------------------------------------------------|
| 1             | Phenazine biosynthesis              | 17          | PA0522, PA3039, PA5383, PA1219, PA1221, PA1220, PA1216, PA1218, <i>phzA1</i> , <i>phzG2</i> , <i>phzE2</i> , <i>phzC2</i> , <i>phzD2</i> , <i>phzM</i> , <i>phzS</i> , <i>phzB1</i> , <i>phzF2</i>                                                                                                                                                             |
| 2             | Pyochelin biosynthesis              | 29          | <i>fepD</i> , <i>fepB</i> , PA4155, <i>foxl</i> , <i>pvdS</i> , <i>femI</i> , <i>fiuI</i> , <i>femR</i> , PA5217, PA1301 PA1300, <i>hasAP</i> , PA4570, <i>pchR</i> , <i>fumC1</i> , <i>sodM</i> , PA4471, <i>fiuR</i> , <i>pchA</i> , <i>ampO</i> , <i>pchD</i> , <i>pchB</i> , <i>fptA</i> , <i>pchC</i> , <i>pchE</i> , PA4220, PA4222, PA4223, <i>pchF</i> |
| 3             | Phosphate transport and acquisition | 23          | PA2120, <i>hocS</i> , <i>phoB</i> , <i>pstA</i> , <i>pstC</i> , <i>plcN</i> , PA3383, <i>exbB2</i> , <i>phdA</i> , <i>pdtB</i> , PA0701, PA0699, <i>hxcX</i> , <i>lapA</i> , <i>exbD2</i> , PA0696, PA0697, PA0698, <i>hxcQ</i> , PA0700, <i>hxcZ</i> , PA0695, <i>pdtA</i>                                                                                    |
| 4             | Isoprenoid metabolism               | 7           | <i>liuD</i> , <i>liuB</i> , <i>mmsB</i> , PA2557, PA2553, <i>liuC</i> , <i>liuA</i>                                                                                                                                                                                                                                                                            |
| 5             | Magnesium transport                 | 6           | <i>mgtA</i> , PA4826, PA4635, PA4822, PA4824, PA4823                                                                                                                                                                                                                                                                                                           |
| 6             | Aconitate porin                     | 4           | <i>opdH</i> , PA0753, PA0752, PA0754                                                                                                                                                                                                                                                                                                                           |
| 7             | Pyrimidine metabolism               | 3           | <i>dht</i> , PA0440, PA0439                                                                                                                                                                                                                                                                                                                                    |
| 8             | Pyocin Biosynthesis                 | 3           | PA0629, PA0630, PA0637                                                                                                                                                                                                                                                                                                                                         |
| 9             | Spermidine biosynthesis             | 3           | PA4773, PA4774, PA4782                                                                                                                                                                                                                                                                                                                                         |
| 10            | Histidine catabolism                | 2           | <i>hutH</i> , PA5096                                                                                                                                                                                                                                                                                                                                           |
| 11            | Heat shock response                 | 2           | <i>hscA</i> , <i>fdx2</i>                                                                                                                                                                                                                                                                                                                                      |
| 12            | Reactive oxygen stress response     | 2           | <i>ahpF</i> , <i>katB</i>                                                                                                                                                                                                                                                                                                                                      |

1654

1655  
1656

1657 **Table S3. Strains and plasmids used in this study.**

| Strain                             | Lab stock# | Strain description                                                                          | Source                               |
|------------------------------------|------------|---------------------------------------------------------------------------------------------|--------------------------------------|
| <b><i>P. aeruginosa</i></b>        |            |                                                                                             |                                      |
| PA14 WT                            | DH123      | Laboratory reference strain                                                                 | [1]                                  |
| PA14 $\Delta phoB$                 | DH3599     | Deletion mutant in <i>phoB</i>                                                              | This study                           |
| PA14 $\Delta phoB + phoB$          | DH3600     | Native locus complementation of <i>phoB</i>                                                 | This study                           |
| PA14 $\Delta phoR$                 | DH3774     | Deletion mutant of <i>phoR</i>                                                              | [2]                                  |
| PA14 $\Delta phoB + phoR$          | DH3755     | Plasmid-based arabinose inducible over-expression vector of <i>phoR</i>                     | This study                           |
| PA14 $\Delta pstB$                 | DH3601     | Deletion mutant of <i>pstB</i>                                                              | This study                           |
| PA14 <i>pstB::TnM</i>              | DH753      | Transposon insertion mutant of <i>pstB</i>                                                  | [3]                                  |
| PA14 $\Delta phz$                  | DH933      | Deletion mutant of <i>phzA1-G1</i> and <i>phzA2-G2</i>                                      | [4]                                  |
| PA14 $\Delta phzA1$                | DH1728     | Deletion mutant of <i>phzA1</i>                                                             | (Dietrich, Price-Whelan et al. 2006) |
| PA14 $\Delta phzA2$                | DH1735     | Deletion mutant of <i>phzA2</i>                                                             | (Dietrich, Price-Whelan et al. 2006) |
| PA14 $\Delta phzM$                 | DH944      | Deletion mutant of <i>phzM</i>                                                              | [5]                                  |
| PA14 $\Delta mexGHI\Delta ompD$    | DH1376     | Deletion mutant of <i>mexGH1</i> and <i>ompD</i>                                            | [5]                                  |
| PA14 $\Delta soxR$                 | DH1377     | Deletion mutant of <i>soxR</i>                                                              | [5]                                  |
| PA14 $\Delta exaA$                 | DH2256     | Deletion mutant of <i>exaA</i>                                                              | [6]                                  |
| PA14 $\Delta exaA + exaA$          | DH2677     | Native locus complementation of <i>exaA</i>                                                 | [6]                                  |
| PA14 WT PpdtA::lacZ-gfp            | DH3780     | Promoter fusion reported construct of PpdtA chromosomally integrated at the <i>att</i> site | This study                           |
| PA14 $\Delta phoB$ PpdtA::lacZ-gfp | DH3781     | Promoter fusion reported construct of PpdtA chromosomally integrated at                     | This study                           |

|                                                                   |        |                                                                                   |            |
|-------------------------------------------------------------------|--------|-----------------------------------------------------------------------------------|------------|
|                                                                   |        | the <i>att</i> site in $\Delta$ <i>phoB</i> background                            |            |
| CAF2 WT                                                           | DH48   | Laboratory reference strain                                                       | [7]        |
| CAF2 <i>adh1</i> $\Delta/\Delta$                                  | DH2236 | Homozygous deletion mutant of <i>ADH1</i>                                         | [8]        |
| CAF2 <i>adh1</i> $\Delta/\Delta$ + <i>ADH1</i>                    | DH2177 | Heterozygous native locus single allele complementation of <i>ADH1</i>            | [8]        |
| PA14 $\Delta$ <i>ackA</i>                                         | DH3782 | Deletion mutant of <i>ackA</i>                                                    | [9]        |
| PA14 $\Delta$ <i>ackA</i> $\Delta$ <i>pta</i>                     | DH3783 | Deletion mutant of <i>ackA</i> and <i>pta</i>                                     | [9]        |
| PA14 $\Delta$ <i>ackA</i> $\Delta$ <i>pta</i> $\Delta$ <i>phz</i> | Dh3784 | Deletion mutant of <i>ackA</i> , <i>pta</i> , <i>phzA1-G1</i> and <i>phzA2-G2</i> | [9]        |
| PA14 <i>exaA</i> ::TnM                                            | DH2130 | ethanol catabolic transposon insertion mutant                                     | [10]       |
| PA14 <i>pqqB</i> ::TnM                                            | DH2131 | ethanol catabolic transposon insertion mutant                                     | [10]       |
| PA14 <i>acsA</i> ::TnM                                            | DH2132 | ethanol catabolic transposon insertion mutant                                     | [10]       |
| PA14 $\Delta$ <i>kinB</i>                                         | DH3778 | Deletion mutant of <i>kinB</i>                                                    | [2]        |
| PA14 $\Delta$ <i>kinB</i> + <i>kinB</i>                           | DH3779 | Plasmid-based arabinose inducible over-expression vector of <i>kinB</i>           | This study |
| PAO1                                                              | DH3283 | Laboratory reference strain                                                       | [11]       |
| PAO1 $\Delta$ <i>phoB</i>                                         | DH3284 | Deletion mutant of <i>phoB</i>                                                    | [11]       |
| PAO1 $\Delta$ <i>vreA</i>                                         | DH3285 | Deletion mutant of <i>vreA</i>                                                    | [11]       |
| PAO1 $\Delta$ <i>vreI</i>                                         | DH3286 | Deletion mutant of <i>vreI</i>                                                    | [11]       |
| PAO1 $\Delta$ <i>vreR</i>                                         | DH3287 | Deletion mutant of <i>vreR</i>                                                    | [11]       |
| PAO1 $\Delta$ <i>phoB</i> $\Delta$ <i>vreR</i>                    | DH3288 | Deletion mutant of <i>phoB</i> and <i>vreR</i>                                    | [11]       |
| <b><i>E. coli</i></b>                                             |        |                                                                                   |            |
| S17 $\lambda$ pirS                                                | DH71   | Mating competent strain used for plasmid conjugation                              |            |
| <b>Plasmids</b>                                                   |        |                                                                                   |            |
| pMQ30                                                             |        | allelic replacement vector, GmR                                                   | [12]       |
| <i>phoB</i> complement                                            |        |                                                                                   | This study |
| pMQ72                                                             |        | Arabinose inducible over-expression plasmid, empty vector                         | [12]       |
| <i>phoR</i> OE                                                    |        | Arabinose inducible over-expression plasmid, containing <i>phoR</i>               | This study |



|                   |  |                                                                     |            |
|-------------------|--|---------------------------------------------------------------------|------------|
| pHERD20           |  | Arabinose inducible over-expression plasmid                         | [13]       |
| kinB OE           |  | Arabinose inducible over-expression plasmid, containing <i>kinB</i> | [14]       |
|                   |  |                                                                     |            |
| <i>PpdtA-lacZ</i> |  | <i>PpdtA-lacZ</i> promoter fusion, GmR in S17 <i>E. coli</i>        | This study |
| pEX18-Gm          |  | Suicide vector for allelic replacement, GmR                         | [15]       |

1658

1659

1660 **Table S4: Primers used in this study**  
1661

| <b>Constructs and sequencing</b> |                 |                                                                  |
|----------------------------------|-----------------|------------------------------------------------------------------|
| <b>Gene/ Feature</b>             | <b>Primer</b>   | <b>Sequence</b>                                                  |
| <i>phoB</i>                      | phoB_KO_UP_FW   | ccagggtttcccagtcacgacggtgtaaaacgacg<br>gccCCAACGCAACGACCGTCTGGC  |
|                                  | phoB_KO_UP_RV   | ccgtccaggggaaacgactccCCTCCAGGC<br>ACTCGTAGCCG                    |
|                                  | phoB_KO_DWN_FW  | CGGCTACGAGTGCCTGGAGGgggagtc<br>gttcccctggacgg                    |
|                                  | phoB_KO_DWN_RV  | tgtgagcggataacaatttcacacaggaacagct<br>atgaccGCGGGTGTGGCGTCCAGGC  |
|                                  | phoB_KO_CHK_FW  | ccggaacctgttgagcatagccc                                          |
|                                  | phoB_KO_CHK_RV  | ctcctcgacatagacgttgccgc                                          |
|                                  | phoB_KI_F       | ataccggttttttggggaaggagatatacatATG<br>GTTGGCAAGACAATCCTCATCGTTG  |
|                                  | phoB_KI_R       | tctgtatcaggctgaaaatcttctctcatccgccTCA<br>GCTCTTGGTGGAGAAACGATAGC |
|                                  | phoB_KI_check_F | cgtcgcacgcaccaaggcg                                              |
|                                  | phoB_KI_check_R | ccctgttcgctcgcccacc                                              |
|                                  |                 |                                                                  |
| <i>pstB</i>                      |                 |                                                                  |
|                                  | pstB_KO_UP_FW   | agggtttcccagtcacgacggtgtaaaacgacggc<br>cGCGCTACAAGGTCCTGGAAGAGC  |
|                                  | pstB_KO_UP_RV   | gccgcgaccgccagagccCGAAGACTAC<br>ATCACCGGCCG                      |
|                                  | pstB_KO_Down_FW | CGGCCGGTGATGTAGTCTTCGGggc<br>tctggcggctcgcgcc                    |
|                                  | pstB_KO_Down_RV | CGGCCGGTGATGTAGTCTTCGGggc<br>tctggcggctcgcgcc                    |
|                                  | pstB_KO_Chk_FW  | cgctgcgcgagaagtacaagg                                            |
|                                  | pstB_KO_Chk_RV  | ctccacgctgaagatcgaagagctg                                        |
|                                  |                 |                                                                  |

|                 |                  |                                                                                |
|-----------------|------------------|--------------------------------------------------------------------------------|
| <i>phoR</i>     | phoR_KI_F        | cataccggttttttggggaaggagatatacatAT<br>GCAATCCGTCTGTAACCAAGACTG<br>G            |
|                 | phoR_KI_R        | ttaatctgtatcaggctgaaaatcttctcTCATCC<br>GCCTCACTTCGACGCCTTGCGCTC<br>G           |
|                 | phoR_KI_check_R  | gcggaacgtctatgtcgaggag                                                         |
|                 | phoR_KI_check_R  | ctggtgcaggcgcagtagctgc                                                         |
|                 |                  |                                                                                |
| <i>kinB</i>     | kinB_KI_F        | ataccggttttttggggaaggagatatacatATG<br>GAAACCACTTCGAAAAACAGGGG<br>C             |
|                 | kinB_KI_R        | atctgtatcaggctgaaaatcttctcatccgccTC<br>ATAGGCCGTA CTGCTTGCGCTTC                |
|                 | kinB_KI_check_R  | ccgccgaatgcgcggtgacg                                                           |
|                 | kinB_KI_check_R  | gcggaacgtctatgtcgaggag                                                         |
|                 |                  |                                                                                |
| pMQ30           | pMQ30_seq_mcs_FW | CCTCTTCGCTATTACGCCAGCTGG                                                       |
|                 | pMQ30_seq_mcs_RV | GCTCACTCATTAGGCACCCAGG                                                         |
|                 |                  |                                                                                |
| Reporter fusion | p pdtA 1F        | GCGATTGACGGCGGGCGTCGCGAT<br>CGCCGGGGCCGCATGACTGCGGAT<br>CCCTTCTGGAAGCTTGCCGTAC |
|                 | p prhII 2R       | TTGGGACA ACTCCAGTGAAAAGTTC<br>TTCTCCTTTACTCATGACGCGAGAT<br>TCCTTGGGCGTGTTTC    |
| phoB sequencing | FW               | cgtcgcacgcaccaaggcg                                                            |
|                 | RV               | ccctgtctgctggcccacc                                                            |
| pstB sequencing | FW               | ggcacggcaccaggtcagc                                                            |
|                 | RV               | cgacgccgcggtaggcg                                                              |

1664

1665 **References**

1666

1667 1. Rahme LG, Stevens EJ, Wolfort SF, Shao J, Tompkins RG, Ausubel FM. Common  
1668 virulence factors for bacterial pathogenicity in plants and animals. *Science*.  
1669 1995;268(5219):1899-902. PubMed PMID: 7604262.

1670 2. Tan J, Doing G, Lewis KA, Price CE, Chen KM, Cady KC, et al. Unsupervised  
1671 Extraction of Stable Expression Signatures from Public Compendia with an Ensemble of  
1672 Neural Networks. *Cell Syst*. 2017;5(1):63-71 e6. doi: 10.1016/j.cels.2017.06.003.  
1673 PubMed PMID: 28711280; PubMed Central PMCID: PMC5532071.

1674 3. Liberati NT, Urbach JM, Miyata S, Lee DG, Drenkard E, Wu G, et al. An ordered,  
1675 nonredundant library of *Pseudomonas aeruginosa* strain PA14 transposon insertion  
1676 mutants. *Proc Natl Acad Sci U S A*. 2006;103(8):2833-8. Epub 2006/02/16. doi:  
1677 10.1073/pnas.0511100103. PubMed PMID: 16477005; PubMed Central PMCID:  
1678 PMC1413827.

1679 4. Dietrich LEP, Price-Whelan A, Petersen A, Whiteley M, Newman DK. The  
1680 phenazine pyocyanin is a terminal signalling factor in the quorum sensing network of  
1681 *Pseudomonas aeruginosa*. *Mol Microbiol*. 2006;61(5):1308-21. doi: 10.1111/j.1365-  
1682 2958.2006.05306.x.

1683 5. Sakhtah H, Koyama L, Zhang Y, Morales DK, Fields BL, Price-Whelan A, et al.  
1684 The *Pseudomonas aeruginosa* efflux pump MexGHI-OpmD transports a natural  
1685 phenazine that controls gene expression and biofilm development. *Proc Natl Acad Sci U*  
1686 *S A*. 2016;113(25):E3538-47. doi: 10.1073/pnas.1600424113.

1687 6. Crocker AW, Harty CE, Hammond JH, Willger SD, Salazar P, Botelho NJ, et al.  
1688 *Pseudomonas aeruginosa* ethanol oxidation by AdhA in low oxygen environments. *J*  
1689 *Bacteriol*. 2019;JB.00393-19. doi: 10.1128/jb.00393-19.

1690 7. Fonzi WA, Irwin MY. Isogenic strain construction and gene mapping in *Candida*  
1691 *albicans*. *Genetics*. 1993;134(3):717-28. Epub 1993/07/01. PubMed PMID: 8349105;  
1692 PubMed Central PMCID: PMC1205510.

1693 8. Chen AI, Dolben EF, Okegbe C, Harty CE, Golub Y, Thao S, et al. *Candida*  
1694 *albicans* ethanol stimulates *Pseudomonas aeruginosa* WspR-controlled biofilm formation  
1695 as part of a cyclic relationship involving phenazines. *PLoS Path*. 2014;10(10):e1004480-  
1696 e. doi: 10.1371/journal.ppat.1004480.

1697 9. Glasser NR, Kern SE, Newman DK. Phenazine redox cycling enhances anaerobic  
1698 survival in *Pseudomonas aeruginosa* by facilitating generation of ATP and a proton-

1699 motive force. Mol Microbiol. 2014;92(2):399-412. Epub 2014/03/19. doi:  
1700 10.1111/mmi.12566. PubMed PMID: 24612454.

1701 10. Feinbaum RL, Urbach JM, Liberati NT, Djonovic S, Adonizio A, Carvunis AR, et al.  
1702 Genome-wide identification of *Pseudomonas aeruginosa* virulence-related genes using a  
1703 *Caenorhabditis elegans* infection model. PLoS Pathog. 2012;8(7):e1002813. doi:  
1704 10.1371/journal.ppat.1002813. PubMed PMID: 22911607; PubMed Central PMCID:  
1705 PMCPMC3406104.

1706 11. Quesada JM, Otero-Asman JR, Bastiaansen KC, Civantos C, Llamas MA. The  
1707 activity of the *Pseudomonas aeruginosa* virulence regulator  $\sigma$ Vrel is modulated by the  
1708 anti- $\sigma$  factor VreR and the transcription factor PhoB. Front Microbiol. 2016;7:1159-. doi:  
1709 10.3389/fmicb.2016.01159.

1710 12. Shanks RM, Caiazza NC, Hinsa SM, Toutain CM, O'Toole GA. *Saccharomyces*  
1711 *cerevisiae*-based molecular tool kit for manipulation of genes from gram-negative  
1712 bacteria. Appl Environ Microbiol. 2006;72(7):5027-36. PubMed PMID: 16820502.

1713 13. Qiu D, Damron FH, Mima T, Schweizer HP, Yu HD. PBAD-based shuttle vectors  
1714 for functional analysis of toxic and highly regulated genes in *Pseudomonas* and  
1715 *Burkholderia* spp. and other bacteria. Appl Environ Microbiol. 2008;74(23):7422-6. Epub  
1716 2008/10/14. doi: 10.1128/aem.01369-08. PubMed PMID: 18849445; PubMed Central  
1717 PMCID: PMCPMC2592904.

1718 14. Damron FH, Qiu D, Yu HD. The *Pseudomonas aeruginosa* sensor kinase KinB  
1719 negatively controls alginate production through AlgW-dependent MucA proteolysis. J  
1720 Bacteriol. 2009;191(7):2285-95. Epub 2009/01/23. doi: 10.1128/JB.01490-08. PubMed  
1721 PMID: 19168621.

1722 15. Hoang TT, Karkhoff-Schweizer RR, Kutchma AJ, Schweizer HP. A broad-host-  
1723 range Flp-FRT recombination system for site-specific excision of chromosomally-located  
1724 DNA sequences: application for isolation of unmarked *Pseudomonas aeruginosa*  
1725 mutants. Gene. 1998;212(1):77-86. PubMed PMID: 9661666.

1726

1727
